1 **Tensor Image Registration Library: Automated Non-Linear Registration of Sparsely**  
2 **Sampled Histological Specimens to Post-Mortem MRI of the Whole Human Brain.**

3

4 *Istvan N. Huszar<sup>a</sup>, Menuka Pallegage-Gamarallage<sup>b</sup>, Sean Foxley<sup>a,c</sup>, Benjamin C. Tandler<sup>a</sup>,*  
5 *Anna Leonte<sup>b,d</sup>, Marlies Hiemstra<sup>e</sup>, Jeroen Mollink<sup>a,e</sup>, Adele Smart<sup>b</sup>, Sarah Bangerter-*  
6 *Christensen<sup>b,f</sup>, Hannah Brooks<sup>b</sup>, Martin R. Turner<sup>a,b</sup>, Olaf Ansorge<sup>b</sup>, Karla L. Miller<sup>a</sup>, Mark*  
7 *Jenkinson<sup>a</sup>*

8

9 <sup>a</sup> Wellcome Centre for Integrative Neuroimaging, FMRIB, Nuffield Department of Clinical  
10 Neurosciences, University of Oxford, Oxford, UK

11 <sup>b</sup> Nuffield Department of Clinical Neurosciences, University of Oxford, Oxford, UK

12 <sup>c</sup> Department of Radiology, University of Chicago, Chicago, IL, USA

13 <sup>d</sup> Department of Neuroscience, University of Groningen, Groningen, Netherlands

14 <sup>e</sup> Department of Anatomy, Donders Institute for Brain, Cognition and Behaviour, Radboud  
15 University Medical Centre, Nijmegen, Netherlands

16 <sup>f</sup> Brigham Young University, Provo, UT, USA

17

18 **Correspondence should be addressed to:** Istvan N. Huszar

19 E-mail: [istvan.huszar@dtc.ox.ac.uk](mailto:istvan.huszar@dtc.ox.ac.uk)

20 Postal address: Wellcome Centre for Integrative Neuroimaging, FMRIB, John Radcliffe  
21 Hospital, Headington, Oxford, OX3 9DU, United Kingdom

22

23

24

25

26 **Formatting information:** All figures in this manuscript are intended for viewing and printing  
27 in colour.

28

## 29 **Highlights**

30

- 31 • TIRL: new framework for prototyping bespoke image registration pipelines
- 32 • Pipeline for automated registration of small-slide histology to whole-brain MRI
- 33 • Slice-to-volume registration accounting for through-plane deformations
- 34 • No need for serial histological sampling

35

## 36 **Abstract**

37

38 There is a need to understand the histopathological basis of MRI signal characteristics in  
39 complex biological matter. Microstructural imaging holds promise for sensitive and specific  
40 indicators of the early stages of human neurodegeneration but requires validation against  
41 traditional histological markers before it can be reliably applied in the clinical setting.  
42 Validation relies on a precise and preferably automatic method to align MRI and histological  
43 images of the same tissue, which poses unique challenges compared to more conventional  
44 MRI-to-MRI registration.

45

46 A customisable open-source platform, Tensor Image Registration Library (TIRL) is presented.  
47 Based on TIRL, a fully automated pipeline was implemented to align small stained histological  
48 images with dissection photographs of corresponding tissue blocks and coronal brain slices,  
49 and further with high-resolution (0.5 mm) whole-brain post-mortem MRI data. The pipeline  
50 performed three separate deformable registrations to achieve accurate mapping between whole-  
51 brain MRI and small-slide histology coordinates. The robustness and accuracy of the individual  
52 registration steps were evaluated using both simulated data and real-life images from 6  
53 different anatomical locations of one post-mortem human brain.

54

55 The automated registration method demonstrated sub-millimetre accuracy in all steps,  
56 robustness against tissue damage, and good reproducibility between experiments. The method  
57 also outperformed manual landmark-based slice-to-volume registration, also correcting for  
58 curvatures in the slicing plane. Due to the customisability of TIRL, the pipeline can be  
59 conveniently adapted for other research needs and is therefore suitable for the large-scale  
60 comparison of routinely collected histology and MRI data.

61

62 **Keywords:** registration, histology, post-mortem, MRI, brain, human

63

64 **List of abbreviations**<sup>1</sup>

---

<sup>1</sup> ALS: amyotrophic lateral sclerosis, ANHIR: Automatic Non-rigid Histological Image Registration, BOBYQA: Bound Optimisation by Quadratic Approximation, bSSFP: balanced steady-state free precession sequence, CR: correlation ratio, CT: computed tomography, DOF: degrees of freedom, FSL: FMRIB Software Library, FWHM: full width at half maximum, H&E: haematoxylin and eosin (histological stain), LFB+PAS: Luxol fast blue combined with the periodic acid-Schiff procedure (histological stain), MIND: Modality-Independent Neighbourhood Descriptor, MND: motor neuron disease, MRI: magnetic resonance imaging, NEWUOA: New Unconstrained Optimisation Algorithm, NMI: normalised mutual information, OBB: Oxford Brain Bank, OFC: orbitofrontal cortex, PLP: proteolipid protein, pTDP-43: phosphorylated TAR-DNA binding protein 43 kDa, SPM: Statistical Parametric Mapping (software), SSD: sum of squared differences, TIRL: Tensor Image Registration Library, TPS: thin-plate spline

## 65 **1. Introduction**

66

### 67 *1.1. Motivation*

68

69 Histopathological studies have contributed an essential part to our understanding of human  
70 neurodegeneration. Looking at a chemically stained post-mortem tissue sample under a  
71 microscope, one can find molecular evidence for whether or not the observed region of the  
72 central nervous system has been affected by a disease process. Protein aggregates and neuronal  
73 death are among the defining histological features of neurodegeneration [1], usually predating  
74 clinical symptoms by several years [2]. Post-mortem studies of Parkinson's disease [3],  
75 Alzheimer's disease [4] and amyotrophic lateral sclerosis (ALS) [5] have indicated that the  
76 type of aggregates and their spatial distribution in the central nervous system are together  
77 representative of the type of neurodegeneration. Hence the concept of neurodegeneration as a  
78 prion-like spatiotemporal process has emerged [6, 7].

79

80 Being restricted to post-mortem tissue, histology alone provides limited information about the  
81 temporal aspect of the disease and it is often used to study certain regions only instead of  
82 probing the whole human brain. Intra-individual characterisation of neurodegeneration as a  
83 spatiotemporal process therefore requires the combination of histology with a suitable in-vivo  
84 imaging technique that provides full brain coverage, is repeatable and desirably harmless for  
85 the patient.

86

87 Advanced magnetic resonance imaging (MRI) techniques, in addition to capturing gross 3D  
88 anatomical and functional images of the whole brain, can also interrogate tissue properties at  
89 microscopic scales far smaller than the resolved voxel size. When applied to the human brain,  
90 these emerging microstructural MRI methods aim to estimate tissue properties such as neurite  
91 density, intracellular volume fraction [8], axon diameter [9], myelin content [10, 11], and  
92 cortical fibre orientation [12] usually by interpreting local changes of the MRI signal in the  
93 framework of sophisticated biophysical models [13] of tissue structure. Collectively these type  
94 of methods have been regarded as "in-vivo histology" [14, 15] and serve as a promising non-  
95 invasive tool for tracking tissue-level spatiotemporal changes related to human  
96 neurodegeneration. However, it is a matter of active debate [16] how the measured quantities  
97 relate to actual histological parameters, especially in disease.

98

99 In order to characterise the relationship between MRI signal alterations and histopathological  
100 features in motor neuron disease (MND), our group previously acquired multi-modal MRI  
101 scans of whole, post-mortem human brains that were subsequently dissected into blocks for  
102 histopathological staining [17]. This dataset is the subject of an ongoing research project and  
103 will be released in full upon its completion. In the present paper, we address how the resultant  
104 2D histological images can be accurately registered to the 3D whole-brain post-mortem MRI  
105 data in an automated way, enabling systematic voxel-wise comparison between MRI and  
106 histological parameters. First, we provide an overview of existing approaches to MRI–  
107 histology registration, then describe the development of a novel open-source image registration  
108 framework that we used to successfully register images from our dataset.

109

## 110 1.2. Previous work in MRI-histology registration

111

112 It is important to distinguish between two main approaches to MRI-histology registration based  
113 on how the histology data is collected, as it largely determines how the registration is  
114 performed. Over the next few paragraphs we shortly review previously proposed registration  
115 methods for (1) dense systematic histological sampling, and (2) stand-alone histological  
116 images.

117

118 Methods of the first kind are well-developed with numerous examples [18-28] from as early as  
119 1994. A comprehensive review of the methods in this category can be found in *Pichat et al*  
120 [29]. For these methods, tissues must be frozen or embedded in a rigid medium and sectioned  
121 at regular intervals. Most commonly the tissue block face is photographed after each section to  
122 serve as a rigid reference. Distortions of the thin tissue sections are compensated by 2D  
123 deformable registration to the corresponding rigid reference, which are subsequently stacked  
124 to create a volume of photographic/histological data. This volume is later registered to the MRI  
125 data using standard 3D registration tools such as ABA [30] or ANTs [31]. As a novelty, *Iglesias*  
126 *et al* [32] recently demonstrated accurate (0.5 – 2 mm) 2D-to-2D histology-to-MRI registration  
127 without photographic intermediates. Assuming perfect slice correspondence, they mapped  
128 sequentially sampled whole-brain histology images to an MRI volume. Complementary to this  
129 work, *Pichat et al* [33] proposed a method for direct histology-to-MRI registration between  
130 small histological samples (as opposed to whole-hemisphere images) and corresponding MRI  
131 slices via automated affine-invariant shape matching, but only reported preliminary results that  
132 required manual MRI slice matching.

133

134 Perhaps the biggest advantage of the methods in this category is that the 3D geometrical  
135 correspondence of the sections is accurately preserved. With the use of a rigid reference, the  
136 “banana effect”, [34] in which an accumulation of small shifts between adjacent slices results  
137 in a shearing in the third dimension, may also be avoided. However, given the size of the human  
138 brain, the acquisition of systematically sampled histology data requires bespoke slicing and  
139 stain automation hardware, none of which is readily available at most neuropathology facilities.  
140 This approach is therefore better suited to study the brains of small animals or, with substantial  
141 time and workforce commitment, a single human brain [35, 36].

142

143 For stand-alone histological images (i.e. a single, small-format slide), a direct slice-to-volume  
144 registration must be employed. Despite the fact that almost the entire body of histology images  
145 that have ever been created in neuropathology facilities for expert interpretation exist in this  
146 format, suitable registration methods are disproportionately underrepresented in the literature.  
147 This might be due to the unique challenge associated with slice-to-volume registration: the  
148 parameters that are necessary to align a potentially distorted 2D image in 3D space have a vast  
149 search space, and a high propensity to converge to local optima, as a small 2D slice may  
150 constitute a relatively good fit at many locations in 3D space. Most reported pipelines are semi-  
151 automatic, requiring accurate manual slice initialisation or annotating correspondent  
152 anatomical structures.

153

154 *Kim et al* [37] reported the first relevant slice-to-volume registration approach between *post-*  
155 *mortem* brain slice photographs and *ante-mortem* MRI, using 2<sup>nd</sup>- and 3<sup>rd</sup>-order polynomial  
156 parametrisation for in-plane and out-of-plane deformations. The method was later used by  
157 *Singh et al* [38] to register histological images of vascular lesions to in-vivo MRI data using  
158 photographic intermediates, reporting an overall registration accuracy of 3-8 mm. *Meyer et al*  
159 [39] reported a semi-automated registration method to align a histological section of murine  
160 glioma to in-vivo MRI using high-resolution *ex-vivo* MRI as an intermediate reference volume.  
161 As an improvement to using polynomials to parametrise deformations, they used thin-plate  
162 splines (TPS) to correct for both in-plane and out-of-plane deformations of the histological  
163 section. However, the accuracy of their method was not mentioned, and the code was not  
164 published. *Osechinskiy et al* [40] registered histological sections of whole hemispheres to 3D  
165 MRI data and conducted a comprehensive analysis of cost functions, optimisation and  
166 transformation methods. The best results were achieved by using TPS-based parametrisation

167 of a 3D deformation field, optimised by the NEWUOA algorithm [41] for Pearson's correlation  
168 of the images. As a further refinement to the technique, they devised a novel similarity metric  
169 based on the correspondence of grey-white matter boundaries [42]. Unfortunately, the authors  
170 never made their implementation publicly available for reuse, prohibiting the test of novel  
171 texture-based cost functions, such as the Modality-Independent Neighbourhood Descriptor  
172 (MIND) [43]. The registration of small histological sections (as opposed to whole-hemisphere  
173 images) was studied by *Ohnishi* et al [44]. Using manual landmarks, they stitched together  
174 smaller histological images into a full hemisphere, and subsequently registered it to a  
175 photograph of the coronal section of the hemisphere, which was further registered to 3D MRI.  
176 Neither in-plane nor out-of-plane deformations were considered in the slice-to-volume step;  
177 the authors instead recommended using specialised hardware to avoid distortions.

178

179 In both categories of problems described above, the pipelines mentioned so far were built for  
180 a specific purpose and have not been released in the form of open-source software. As a  
181 consequence, new experimenters are repeatedly required to invest time and effort into  
182 extensive hardware and/or software development [45], which negatively impacts large-scale  
183 validation studies. Recently, *Majka* et al [46] released Possum, an open-source framework for  
184 reconstructing volumetric histology data, which is a great step toward standardising this aspect  
185 of stack-based MRI-histology registration. A recent preprint by *Alegro* et al [36, 47] reported  
186 an automated pipeline for serial histological sections. To the best of our knowledge, a similar  
187 software tool for slice-to-volume registration of small stand-alone histological images to MRI  
188 data is still not available to date.

189

190 In the present work, we aim to address this need by describing a new open-source image  
191 registration framework that aims to integrate previously published methods in a single package,  
192 providing a customisable workflow that is compatible with most common image formats for  
193 MRI, histology and photographs. Based on this framework, we propose a fully automated  
194 registration pipeline to align small histological sections with volumetric MRI data using  
195 photographic intermediates. As an additional novelty, we demonstrate by example that in the  
196 case of free-hand brain cutting, involuntary deflections from the slicing plane are large enough  
197 to disrupt the anatomical correspondence between histological sections and visually matched  
198 slices of the MRI volume, and explain how these distortions are compensated within the  
199 proposed pipeline.

200

201 The organisation of the paper is as follows. In ‘Materials and Methods’ we describe the  
202 acquisition (*section 2.1*) and pre-processing (*section 2.2*) of the imaging data, formulate the  
203 registration problem (*section 2.4*), introduce the Tensor Image Registration Library (TIRL)  
204 (*section 2.5*), and finally describe each stage of the proposed MRI-histology registration  
205 pipeline (*sections 2.6-2.8*) as well as the combination of all stages (*section 2.9*). In ‘Results’  
206 we present summative or representative registration results and describe the accuracy of each  
207 stage (*sections 3.1-3.3*) as well as showing an example of end-to-end MRI-histology  
208 registration (*section 3.4*). Finally, in *section 3.5* we introduce an optional stage that may be  
209 used to refine end-to-end registration results and show a further example of MRI-histology  
210 alignment. In the ‘Discussion’ section we highlight potential directions for further  
211 improvement and finally identify the role of the current developments in the broader context  
212 of neuroimaging research.

213

## 214 **2. Material and Methods**

215

### 216 *2.1. Imaging data acquisition*

217

218 Figure 1 summarises the collection of the imaging data that served as a starting point for the  
219 present study. All data was collected and used according to the Oxford Brain Bank’s (OBB)  
220 generic Research Ethics Committee approval (15/SC/0639). Written informed consent was  
221 obtained by the OBB from all participants of this study. Thirteen formalin-fixed post-mortem  
222 brains with neuropathologically and clinically verified MND were obtained from the cases of  
223 the OBB between 2014 and 2017. The median age of the donors was 65.5 years at death (full  
224 range: 27-77 years), and ten of them were males, two of them females. An additional three  
225 brains with no neuropathological hallmarks or clinical records of neurodegeneration were  
226 obtained as controls (age at death: 61, 76, 89 years; 2 males, 1 female). The post-mortem  
227 interval of the brains varied between 1 and 7 days (median: 3 days). The brains (denuded of  
228 the dura mater) were immersed in 10% neutral buffered formalin for at least 1 month to allow  
229 even preservation of the tissues throughout the full volume of the brain. Before scanning, each  
230 specimen was placed into a brain-shape plastic container to prevent large deformations and the  
231 container was filled with Fluorinert to suppress the background signal. Scans were performed  
232 on a clinical 7T Siemens MRI scanner at the Wellcome Centre for Integrative Neuroimaging  
233 (University of Oxford) using an optimised 48-hour acquisition protocol yielding quantitative  
234 T1 and T2 maps at 1 mm isotropic resolution, T2\* and susceptibility maps at 0.5 mm isotropic



235 resolution, DWI at 0.85 mm isotropic resolution and a bSSFP anatomical reference scan at 0.25  
 236 mm isotropic resolution (also referred to as 3D-TRUFI) [17, 48]. The MRI images were aligned  
 237 and post-processed with an in-house pipeline (*B.C. Tendler*, in preparation). For the purposes  
 238 of the present paper, only the anatomical reference scan (resampled to 0.5 mm isotropic  
 239 resolution) was used, because it exhibited the highest contrast between grey and white matter.  
 240

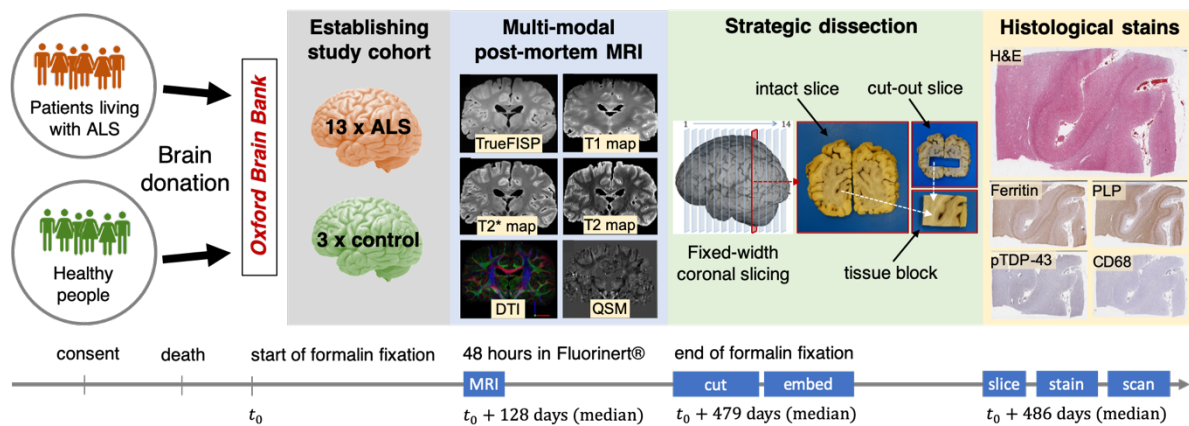

241  
 242 **Figure 1. Overview of image data collection.** Whole human brains were obtained from the Oxford Brain  
 243 Bank from 3 consented healthy individuals and 13 patients with MND. Multi-modal quantitative MR images  
 244 were acquired from each brain after at least 1 month of formalin fixation (4 months on average). The brains  
 245 were dissected with a standard protocol for histopathological staging. Coronal brain slices were  
 246 photographed on both sides before and after the excision of smaller tissue blocks of interest, which were  
 247 also photographed. H&E, immunostains for ferritin, PLP, pTDP-43, and CD68 stains were created from the  
 248 superficial layers of each tissue block.

249  
 250 The formalin-fixed whole brains were subsequently dissected at the Neuropathology  
 251 Department of the John Radcliffe Hospital (Oxford). Following an optimised whole-brain  
 252 sampling protocol [17], the brain was manually sliced into approximately 1 cm thick coronal  
 253 sections, starting from the plane of the mamillary bodies toward the anterior and posterior poles  
 254 of the brain. The total number of slices (13-17) varied with the size of the brain. As part of the  
 255 protocol, *en bloc* dissection of the hand knob from the primary motor (M1) and primary sensory  
 256 (S1) cortices in advance of the coronal slicing resulted in bilateral damage in a few of the  
 257 middle slices. (We will refer to the extracted block later as the “M1S1 block”). From predefined  
 258 anatomical locations in each slice, one or more smaller tissue blocks were extracted by knife  
 259 section. The size and shape of the blocks varied across sampling sites, but most of them were  
 260 not larger than a few centimetres. The whole process was carefully documented by routinely  
 261 capturing photographs of (1) both the anterior and posterior surfaces of the coronal slices, (2)

262 each coronal slice after the extraction of a new tissue block, and (3) both the anterior and  
263 posterior faces of all tissue blocks (Figure 1). The size of the raw photographs was  
264  $5472 \times 3648$ , and their resolution was later recorded from a size guide in the images as  $\sim 55$   
265  $\mu\text{m}/\text{pixel}$ .

266

267 Finally, all tissue blocks were embedded in paraffin and sectioned on a microtome at 6-10  $\mu\text{m}$   
268 thickness. Tissue sections were stained by various histological methods, including standard  
269 haematoxylin and eosin (H&E) and immunocytochemistry for proteins of interest such as ferritin,  
270 myelin proteolipid protein (PLP), activated microglia and macrophages (CD68),  
271 phosphorylated TAR-DNA binding protein-43 (pTDP-43) and pan microglia (Iba-1).  
272 Specifically for the purpose of registration with MRI, additional LFB+PAS (Luxol fast blue  
273 combined with the periodic acid-Schiff procedure) staining was performed on two blocks of a  
274 single brain. Digital whole-slide images were created in SVS format using an Aperio  
275 ScanScope slide scanner at  $\times 20$  objective magnification, yielding a typical matrix size of  
276 approximately  $60000 \times 45000$  at full resolution ( $\sim 0.5 \mu\text{m}/\text{pixel}$ ).

277

## 278 2.2. *Image pre-processing*

279

280 Before entering the registration pipeline, all of the above-mentioned images underwent a  
281 number of pre-processing steps to (1) reduce some of the variability of the input and (2) aid  
282 registration by addressing structural discrepancies between corresponding images.

283

284 *Ad 1.* To standardise the input of the registration pipeline, brain slices and tissue blocks were  
285 isolated from other objects in the photographs by cropping the central 50% and 30% of the  
286 original images along each axis, and segmented from the blue matte background using *k*-means  
287 classification ( $k = 2$ ) of the RGB vectors in the cropped image. The images were smoothed  
288 with the mean shift algorithm ( $r_{\text{spatial}}: 3 \text{ px}$ ,  $r_{\text{RGB}}: 10$ ) before the classification to prevent noisy  
289 segmentation within the tissue. Tissue debris and glare occasionally resulted in false positive  
290 segmentation that were successfully removed by searching for connected components in the  
291 segmented image and discarding anything under an area of 2000 pixels (resolution:  $50 \mu\text{m}/\text{px}$ ).  
292 As a result of the pre-processing, brain slice and tissue block photographs had an approximate  
293 size of  $2500 \times 2500$  pixels and  $800 \times 800$  pixels, respectively, 3 colour channels and zero-  
294 filled background. The histological images were imported from the lowest resolution level

295 (~5  $\mu\text{m}/\text{px}$ ) of the digitised whole-slide images, and further subsampled to match the resolution  
296 of the photographs. As suggested by *Jenkinson* and *Smith* [49, 50] Gaussian smoothing was  
297 applied to the images before downsampling (with FWHM in mm set to the downsampling  
298 factor) to ensure that new pixel values are representative of all pixels in the original image.  
299 Finally, all photographs and the histological images were flattened into 8-bit grayscale images  
300 by taking the Euclidean norm of the RGB vectors.

301

302 *Ad 2.* Due to the post-mortem nature of the study, full anatomical correspondence may not be  
303 guaranteed between corresponding image pairs. For example, as long as the cerebellum is  
304 removed at the start of the dissection process, coronal sections of the MR volumes will be  
305 different from the corresponding autopsy photographs, and lead to severe registration error in  
306 occipital slices. Similarly, missing parts of the motor and sensory cortices has a similar  
307 consequence for the slices that are close to the centre. These structural discrepancies were also  
308 addressed by pre-processing. We used the cerebral segmentation tool in BrainSuite (ver. 18)  
309 [51] to perform brain extraction and remove the cerebellum from the high-resolution structural  
310 MRI scan before it was fed into the pipeline. Furthermore, hand-drawn binary 2D masks were  
311 used to facilitate slice-to-volume registration at the centre of the brain, where parts of the  
312 hemispheres were absent from the photographs as a result of removing the M1S1 blocks.

313

### 314 2.3. Overview of the registration pipeline

315

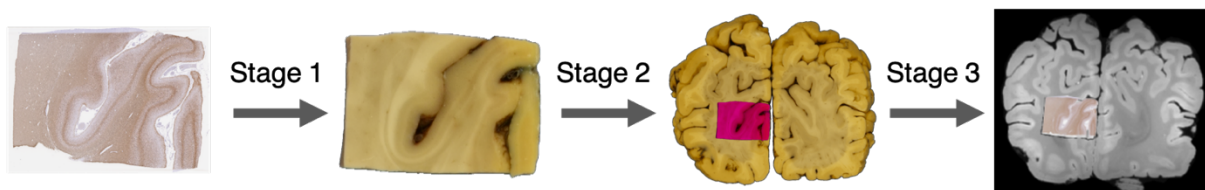

316

317 **Figure 2. Overview of the three independent deformable registration steps of the pipeline.** Stage 1:  
318 histology to tissue block photograph, stage 2: tissue block to brain slice photograph, stage 3: brain slice  
319 photograph to MRI volume. MRI-histology registration is realised by optimising each stage separately and  
320 eventually combining all three stages into a single, final transformation. As discussed later in *section 3.5*, an  
321 optional 4<sup>th</sup> stage may be employed to fine tune the alignment of the registered histological section within  
322 the MRI volume.

323

324 As shown in Figure 2, the proposed automated registration pipeline imports the pre-processed  
325 images (histology, photograph, MRI), and performs three consecutive registrations (stages 1,  
326 2, and 3) to map the pixels of a histological image ( $x \in \mathbb{R}^2$ ) on the voxels of MRI data ( $x' \in$

327  $\mathbb{R}^3$ ). An optional extension to the pipeline (stage 4) will be described in *section 3.5*, following  
328 the discussion of registration results based on the three main stages.

329

#### 330 2.4. Formulation of image registration

331

332 In the following paragraphs we describe the mathematical formulation for registering two-  
333 dimensional scalar-valued (single-channel) images. We do this to keep notations as simple as  
334 possible, but the derivation can be readily extended for images with three spatial dimensions  
335 and/or multiple channels (i.e. vector-, matrix- or tensor-valued pixels or voxels), and the actual  
336 implementation follows the general case.

337

338 We define a single-channel target ( $T(\mathbf{x}) \in \mathbb{R}$ ) and a single-channel source ( $H(\mathbf{x}') \in \mathbb{R}$ ) image  
339 as continuous functions on finite Euclidean domains  $\Omega \subset \mathbb{R}^d$ , and  $\Psi \subset \mathbb{R}^d$  of dimension  $d =$   
340 2. We further define a bijection  $\phi_{\mathbf{p}}(\cdot)$  with parameters  $\mathbf{p}$  that maps the coordinates of  
341 corresponding pixels between the source and the target domain:  $\phi_{\mathbf{p}}: \Psi \rightarrow \Omega$ ,  $\mathbf{x} = \phi_{\mathbf{p}}(\mathbf{x}')$ , and  
342 its inverse such that  $\phi_{\mathbf{p}}^{-1}(\mathbf{x}) = \mathbf{x}'$ . Using this notation, the registration problem between two  
343 images may be formalised as:

344

$$\arg \min_{\mathbf{p}} D_{\theta} \left( T(\mathbf{x}), H \left( \phi_{\mathbf{p}}^{-1}(\mathbf{x}) \right) \right) + R_{\eta}(\mathbf{p}) \quad (1)$$

345

346 where  $D_{\theta}(\cdot)$  is a distance function (or cost) with parameters  $\theta$ , that quantifies the dissimilarity  
347 of corresponding pixels.  $R_{\eta}$  is the regularisation term that imposes constraints on the  
348 transformation parameters (such as spatial smoothness or elasticity *etc* [52]) and smooths the  
349 objective function for efficient optimisation. The most common choice for  $D_{\theta}(\cdot)$  is the sum of  
350 squared intensity differences (SSD):

351

$$SSD = \int_{\Omega} \left( T(\mathbf{x}) - H \left( \phi_{\mathbf{p}}^{-1}(\mathbf{x}) \right) \right)^2 d\mathbf{x} \quad (2)$$

352

353 However, SSD becomes problematic when images of different modalities are concerned (such  
354 as MRI, CT, photographs, histology *etc.*), as in this case the images may exhibit different  
355 internal contrast and the assumption of a monotonic relationship between intensity difference

356 and anatomical dissimilarity no longer prevails. Alternative distance measures that can be used  
 357 in the multi-modal context are correlation ratio (CR), and normalised mutual information  
 358 (NMI) [49]. In the context of MRI-histology registration none of these statistical measures are  
 359 ideal, because the region of interest that corresponds to a histological section may only  
 360 constitute a small number of voxels in MRI space. In this work, we therefore use a more  
 361 recently proposed pattern-based approach called the Modality-Independent Neighbourhood  
 362 Descriptor (MIND) [43], which is a non-linear image operation that enables us to subsequently  
 363 use SSD on multi-modal data. In essence, MIND captures the local self-similarity of the image  
 364 by replacing each pixel value with a vector, the components of which describe the intensity  
 365 relationship of the current pixel with that of its neighbours in a directionally dependent manner.  
 366

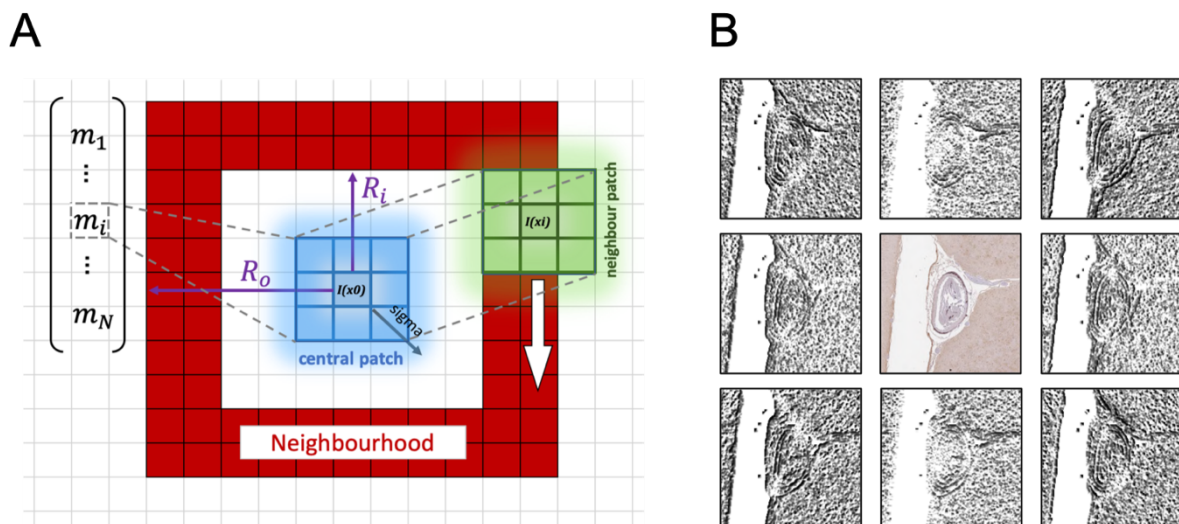

367  
 368 **Figure 3. The modality-independent neighbourhood descriptor (MIND).** (A) schematic of MIND  
 369 calculation for the pixel at the centre (at  $x_0$ ). A neighbourhood (red) is defined as a hollow square plate by  
 370 the half side lengths of its inner ( $R_i$ ) and outer ( $R_o$ ) bounding squares. Each component of the MIND vector  
 371 ( $m_i$ ) represents the dissimilarity between the central (blue) patch and the peripheral (green) patch that is  
 372 centred on the  $i$ -th element of the neighbourhood (at  $x_i$ ). Dissimilarity is calculated as the sum of squared  
 373 differences between corresponding elements of the two patches. Resultant values are normalised by the local  
 374 variance and taken as a negative exponent of an exponential function (cf. equations in *section 2.4*). Values  
 375 of the raw MIND vector are finally scaled such that the largest MIND component at each pixel becomes 1.  
 376 (B) Result of the 2D MIND operation ( $R_i = 0$ ,  $R_o = 1$ ) on a small portion of an actual histological image.  
 377 (The image was flattened to grayscale before the MIND operation.) Black-and-white images on the periphery  
 378 correspond to individual components of the MIND vectors according to their position in the 8-  
 379 neighbourhood. Note the direction-sensitive enhancement of image edges in each tile.  
 380

381 To calculate the MIND-representation of a single-channel image, we first discretise our  
 382 previous image definitions such that  $\mathbf{x}$  denotes target pixel coordinates (non-negative integers),  
 383 and we define a small set of neighbourhood intensities around each pixel (Figure 3A, red tiles):  
 384

$$\mathcal{N}(\mathbf{x}) = \{I(\mathbf{x} + \mathbf{r}_i) \mid \mathbf{r}_1, \mathbf{r}_2, \dots, \mathbf{r}_i, \dots, \mathbf{r}_N \in \mathbb{Z}^d\} \quad (3)$$

385  
 386 The neighbourhood may be of arbitrary shape. Here we parametrise it as a hollow square plate  
 387 that is defined by the half side lengths of its inner ( $R_i \geq 0$ ) and outer ( $R_o \geq 1$ , and  $R_o > R_i$ )  
 388 bounding squares (see Figure 3A).

389  
 390 In a way that is similar to the definition of the pixel's neighbourhood, we further define  
 391 identical patches around both the central pixel ( $I(\mathbf{x}) \in \mathbb{R}$ ) ( $\mathcal{P}_c$ ) and each of the pixels in its  
 392 neighbourhood ( $\mathcal{P}_{1..i..N}$ ) (Figure 3A, *blue and green squares*):  
 393

$$\begin{aligned} \mathcal{P}_c(\mathbf{x}) &= \{I(\mathbf{x} + \mathbf{p}_j) \mid \mathbf{p}_1, -\mathbf{p}_1, \dots, \mathbf{p}_j, -\mathbf{p}_j, \dots, \mathbf{p}_P, -\mathbf{p}_P \in \mathbb{Z}^d\} \\ \mathcal{P}_i(\mathbf{x} + \mathbf{r}_i) &= \{I(\mathbf{x} + \mathbf{r}_i + \mathbf{p}_j) \mid \mathbf{p}_1, -\mathbf{p}_1, \dots, \mathbf{p}_j, -\mathbf{p}_j, \dots, \mathbf{p}_P, -\mathbf{p}_P \in \mathbb{Z}^d\} \end{aligned} \quad (4)$$

394  
 395 With each of the  $|\mathcal{N}|$  components of the MIND vector the aim is to represent the similarity of  
 396 the central patch to one of the neighbourhood patches, hence the  $i$ -th component of the MIND  
 397 vector  $\mathbf{m}(\mathbf{x})$  at pixel  $\mathbf{x}$  is defined as:  
 398

$$m_i(\mathbf{x}) = k_i \cdot \exp\left(-\frac{\mathcal{D}(I, \mathbf{x}, \mathbf{x} + \mathbf{r}_i)}{V(I, \mathbf{x})}\right) \quad (5)$$

399  
 400 where  $\mathcal{D}$  is the patch-based image dissimilarity index of the image at  $\mathbf{x} \in \mathbb{R}^d$  with respect to  
 401 the  $i$ -th neighbourhood point at  $\mathbf{x} + \mathbf{r}_i$ . The dissimilarity index is essentially the squared  
 402 difference between the intensities at  $\mathbf{x}$  and  $\mathbf{x} + \mathbf{r}_i$ , but instead it is calculated as a sum of all  
 403 squared differences between the corresponding elements of the central and the neighbourhood  
 404 patches ( $\mathcal{P}$ ) to maintain robustness against image noise (Figure 3A, blue and green squares):  
 405

$$\mathcal{D}(I, \mathbf{x}, \mathbf{x} + \mathbf{r}_i) = \sum_{j=0}^{|\mathcal{P}|-1} (I(\mathbf{x} + \mathbf{p}_j) - I(\mathbf{x} + \mathbf{r}_i + \mathbf{p}_j))^2 \quad (6)$$

406

407 and  $V$  is the local intensity variance of the image at pixel  $\mathbf{x}$ :

408

$$V(I, \mathbf{x}) = \frac{1}{|\mathcal{N}|} \sum_{i=0}^{|\mathcal{N}|-1} \mathcal{D}(I, \mathbf{x}, \mathbf{x} + \mathbf{r}_i) \quad (7)$$

409

410  $k_i$  is a normalisation factor that ensures that the largest component of the MIND vector (of size  
411  $|\mathcal{N}|$ ) at every  $\mathbf{x}$  is 1. As a result of the MIND transformation, the similarity of multi-modal  
412 images can be defined as the squared Euclidean distance between the corresponding MIND  
413 vectors of the target ( $\mathbf{m}_T(\mathbf{x})$ ) and the source ( $\mathbf{m}_H(\mathbf{x})$ ):

414

$$SSD_{MIND} = \sum_{\mathbf{x} \in \Omega} \left\| \mathbf{m}_T(\mathbf{x}) - \mathbf{m}_H(\phi_p^{-1}(\mathbf{x})) \right\|_2^2 \quad (8)$$

415

416 In the same fashion, for a multi-channel image, the original vector value of each pixel would  
417 be replaced by a matrix upon MIND transformation, and the dissimilarity of matrix-valued  
418 MIND representations would be expressed as the sum of squared elementwise differences. For  
419 a more detailed description on MIND see Heinrich et al [43].

420

## 421 2.5. Tensor Image Registration Library

422

423 Our novel image registration platform, the Tensor Image Registration Library (TIRL) uses the  
424 formalism laid out in *section 2.4* to aid fast prototyping of bespoke image registration pipelines  
425 for virtually any kind of images. All elements of the automated MRI-histology registration  
426 pipeline described in this paper were implemented in TIRL. The framework is based on  
427 Python 3.7, offering rich customisability via scripting. TIRL is a fully open-source project  
428 distributed as part of an upcoming release of the FMRIB Software Library (FSL) [53], with the  
429 intention to be used and further extended by community members. The main features of the  
430 library are summarised below.

431

432 TIRL follows an object-oriented programming paradigm. The registration process is realised  
433 by the interaction of several objects (Figure 4): the source and the target images (*TImage*), their  
434 domains (*Domain*), the coordinate transformations (*Transformation*), the cost function (*Cost*),  
435 the regularisation term (*Regulariser*), and the optimisation algorithm (*Optimiser*). TIRL

436 defines custom file formats for saving any of the *TImage* (.timg), *Domain* (.dom),  
437 *Transformation* (.tx) and *TransformationGroup* (.txg) objects, which can later be loaded back  
438 into any compatible pipeline or used to extract quantitative transformation details after the  
439 registration is complete.

440

441 Similarly to the NIfTI standard for MR images [54], TIRL's *TImage* is defined in physical  
442 space. This means that the image data is stored in a regular voxel grid with arbitrary number  
443 of dimensions ( $N$ ), but each point in this voxel grid has an associate location in physical space  
444 (sometimes referred to as 'millimetre-coordinates'). This is equivalent to the statement that  
445 each *TImage* is defined on a *Domain*. While NIfTI limits the mapping between voxel space  
446 and physical space coordinates to a single rigid/affine transformation (via the *q-form* and *s-*  
447 *form* matrices), the *Domain* object performs this mapping via a chain of *Transformation*  
448 objects, some of which may also be non-linear transformations. Hence, the position of a  
449 *TImage* in physical space can be manipulated by adding or removing *Transformations* from  
450 *TImage*'s *Domain*, without changing the image data. Alternatively, the resolution of the image  
451 can be changed by evaluating the *TImage* on a new *Domain* that has the same physical extent  
452 but different matrix size.

453



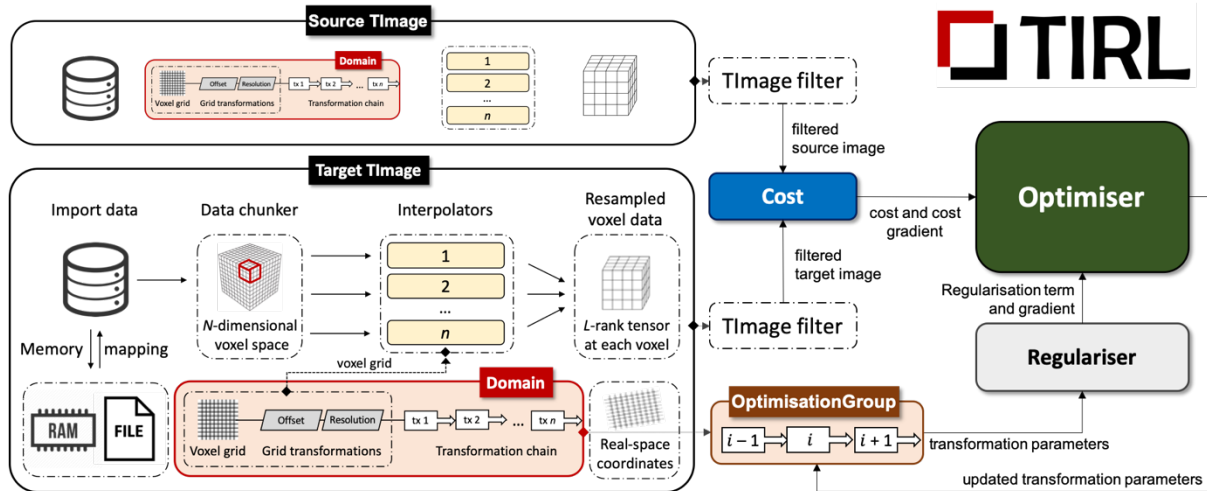

454

455

456

457

458

459

460

461

462

463

464

465

466

467

468

469

470

471

472

473

474

475

476

477

478

479

480

**Figure 4. Schematic of the image registration logic within TIRL.** Shapes with colour correspond to objects in the TIRL namespace. The source and target *TImage* objects comprise a memory-mapped container for raw (high-resolution) image data, a *Domain* object that defines the physical extent of the image by a chain of *Transformations*, and an array of *Interpolators* that map the high-resolution image data onto the current *Domain*. Both the target and the source images are passed through an image filter (to select a colour channel or calculate MIND *etc.*). The *Cost* object evaluates the filtered source image on the *Domain* of the filtered target image, and computes both the scalar cost and the cost gradient according to the object's internal routine that is specific to the type of the *Cost* object (e.g. NMI, CR, SSD, *etc.*). These are fed into the *Optimiser* together with the regularisation term and regularisation gradients. The latter two are computed from the transformation parameters by the *Regulariser* object. The transformation parameters are pooled from the transformations of the target image chain that are selected by the *OptimisationGroup* object for simultaneous optimisation. (This object also allows transformations to be simultaneously optimised in both images.) Transformation parameters are updated in-place by the *Optimiser* object via the *OptimisationGroup*, until one of the convergence criteria is met (which is a parameter of the *Optimiser*).

A major advantage of the transformation chain formalism is that for example an affine transformation can be parametrised as permutations of scaling, rotation, shear, and translation transformations, and any of those components can be optimised separately and repeatedly at any point of the pipeline using the same syntax. Furthermore, the interpretation of transformation chains follows geometric intuition as opposed to affine matrices, especially in three dimensions.

A rich set of linear and non-linear transformations are currently implemented in TIRL. In particular, 3D rotations can be parametrised using *Euler* angles, rotation matrix, axis-angle, and quaternion formalism, with supported conversion between any two of these. The currently implemented options for non-linear transformations are polynomial coordinate

481 transformations, and densely or sparsely defined displacement fields. This repertoire may be  
482 further extended by subclassing any of the *Transformation* objects.

483

484 The current version of TIRL implements the SSD, NMI, CR and  $SSD_{MIND}$  cost functions, as  
485 well as regularisation terms based on L1 and L2 norms, and membrane energy. TIRL is  
486 compatible with all gradient-free and gradient-based optimisation algorithms available from  
487 the SciPy [55] and NLOpt [56] optimisation libraries. Custom implementations of cost  
488 functions, regularisation terms, and optimisation algorithms are also supported via the *Cost*,  
489 *Regulariser*, and *Optimiser* base classes.

490

491 Image masks are often used in neuroimaging on diseased or artefacted images to downweight  
492 the cost for these regions, preventing erroneous registration. In TIRL, masks can be specified  
493 for each *TImage*, and these are adaptively combined during registration to weight the cost  
494 function for the intersection of the target and the source image.

495

496 TIRL supports easy importing from various file formats and provides an all-compatible  
497 workflow for various kinds of images (e.g. scalar-, vector-, matrix-, tensor-valued images with  
498 arbitrary number of dimensions) via the *TImage* object. It is an  $N$ -dimensional image, in which  
499 every voxel value is an  $L$ -rank tensor. For large images that do not fit in memory, the data of  
500 the *TImage* is dynamically retrieved from a memory-mapped binary file that resides on the  
501 hard drive. Furthermore, all *TImage* operations (including interpolation) are automatically  
502 chunked and parallelised for faster computation.

503

504 We implemented all three steps of the proposed MRI–histology registration pipeline in TIRL  
505 because it enables fast prototyping and rich customisation of bespoke image registration  
506 pipelines and has the flexibility to work with mixed sets of 2D and 3D images.

507

## 508 2.6. Stage 1: Histology image to tissue block photograph

509

510 The registration between a histological image and the corresponding tissue block photograph  
511 can be formalised in either direction. Morphing the domain of the histology image to the tissue  
512 block has the advantage of providing forward mapping towards the MRI end of the pipeline,  
513 hence, it is not necessary to invert any transformations to find a certain histological feature in  
514 MRI space. On the other hand, resampling the histology image and the MRI image on any of

515 the photographic intermediates requires less non-linear deformation from both ends, resulting  
516 in a more symmetric registration approach with potentially less inverse-consistency error [57].  
517 We therefore adopted the latter formalism, and denoted the block as the target, and the  
518 histology image as the source.

519

520 In line with Equation (1), we define the inverse transform (the one that maps the target domain  
521 onto the source domain) as a chain of *Transformation* objects acting on the *Domain* of the  
522 target *TImage* (tissue block photo). As shown by the top bar in Figure 5, the chain comprises  
523 2D scaling, 2D rotation, 2D affine, 2D translation, and 2D deformation. The chain is prepended  
524 with a *Translation* object that moves the pixel at the centre of the image to the origin, ensuring  
525 that the first chain operation is applied on centralised pixel coordinates. The order of  
526 *Transformation* objects within the chain follows the intuition behind aligning the images by  
527 hand. Rotations come after scaling to ensure that the image is stretched along the original pixel  
528 axes, and rotations precede translations to ensure that rotations are carried out about the centre  
529 of the image, not some arbitrary centre of rotation. In TIRL, it is possible to simultaneously  
530 optimise any subset of transformations in the chain. By optimising transformations in the order  
531 of increasing degrees of freedom (DOF), previously optimised coarser transformations provide  
532 a more suitable initialisation for finer transformations that are optimised later. This increases  
533 the chance of finding the global optimum by local optimisation methods, which are generally  
534 faster than global optimisation methods. When choosing transformations for simultaneous  
535 optimisation, it is important to avoid optimising redundant parameter pairs against each other,  
536 such as the components of a full affine matrix against rotation angles, as this would create  
537 infinitely many equal minima in the cost function and lead to undetermined behaviour of the  
538 optimiser. In this particular case, rotation angles would have to be optimised first to achieve a  
539 coarse initialisation, and held constant while the components of the affine transformation  
540 matrix are fine-tuned, accounting for both shears and finer rotations. Based on these  
541 considerations, stage 1 optimises the above transformation chain in four steps: (1) rotation  
542 search, (2) rigid registration with anisotropic scaling (“pseudo-rigid registration”), (3) affine  
543 registration, and (4) non-linear registration. Now we discuss these optimisation stages in  
544 greater detail.

545

546 (1) *Rotation search*: a line search with constant  $10^\circ$  increments is conducted around the full  
547 circle to find the best initial rotation for the images. In our experiments we found that  $10^\circ$  was  
548 a good compromise between computational performance and the robustness of the

549 initialisation. The search maximises NMI using Powell’s method [58] at 0.5 mm isotropic  
 550 resolution. (2) “Pseudo-rigid” registration: starting from the three best initial rotations, a 5-  
 551 DOF registration (2D rotation + 2D translation + 2D anisotropic scaling) is carried out using  
 552  $SSD_{MIND}$  as the cost function, and the BOBYQA optimiser [59] at 0.5 mm isotropic resolution.  
 553 Similar tests carried out by *Osechinskiy et al* [40] had suggested the use of the NEWUOA  
 554 optimiser, but we found the convergence properties of its bounded variant, BOBYQA more  
 555 reliable for this purpose. We also found that MIND-based rigid registration was robust enough  
 556 to identify some major defects in the structural correspondence of the images (e.g. when a piece  
 557 of tissue is torn at the corner during histological processing). To find these regions, the  
 558 binarized source image was subtracted from the binary target and the identified regions were  
 559 sorted by area. Anything larger than 5% of the block surface was added to the target mask as a  
 560 zero-filled region to exclude it from the computation of the cost. (An example mask is given  
 561 in the supplementary material.) In TIRL, the masks from the source and target image are  
 562 combined and used as a multiplier for the cost and – in case of gradient-based optimisation –  
 563 the cost derivative, desensitising the optimisation algorithm to changes in an area where the  
 564 mask value is close to zero. The best rigid initialisation was chosen from the three results on  
 565 the basis of minimum final  $SSD_{MIND}$  cost, and fed into *the affine registration step* (3) at  
 566 0.5 mm, 0.25 mm and 0.1 mm resolutions, optimised for  $SSD_{MIND}$  using the BOBYQA  
 567 optimiser.  
 568

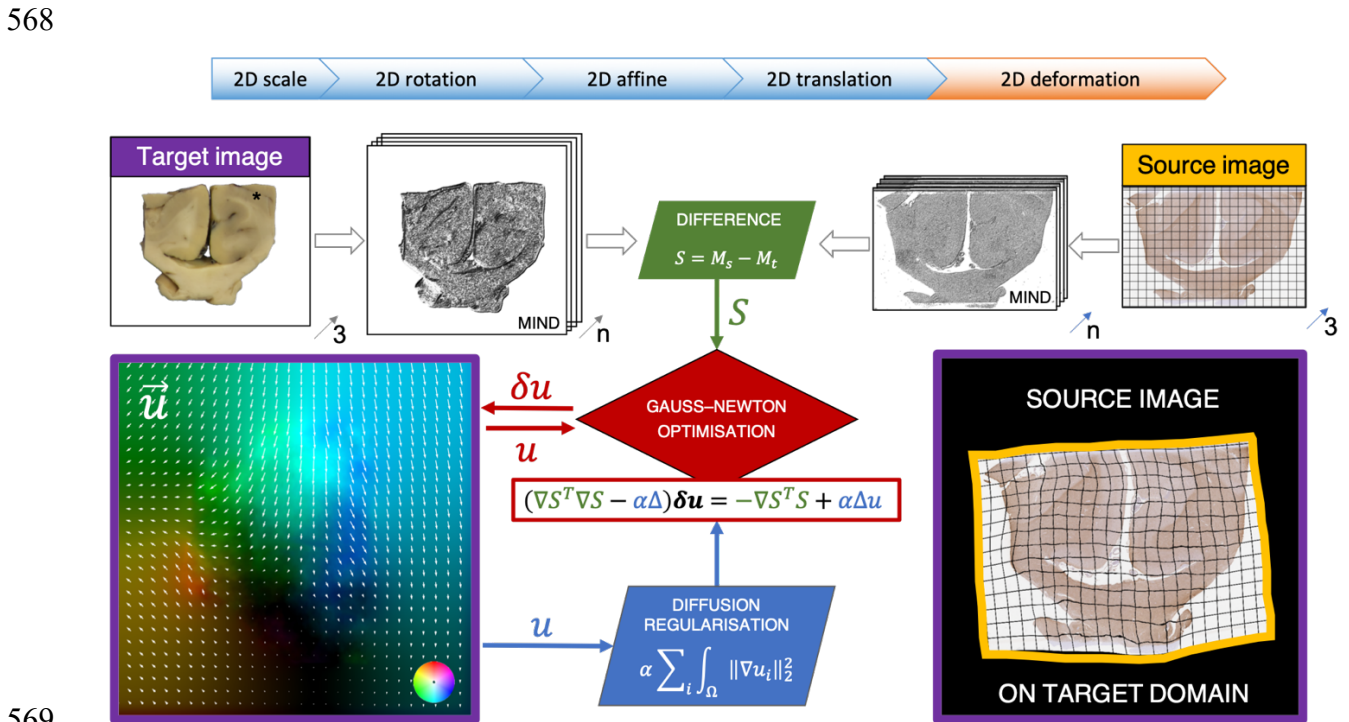

570 **Figure 5. Overview of stage 1: histology-to-block registration.** *Top bar:* transformation chain of the target  
571 image domain. The chain is optimised in four steps: rotation search (2D rotation), rigid registration with  
572 anisotropic scaling (2D scale, 2D rotation, 2D translation), affine registration (2D affine), and non-linear  
573 registration (2D deformation). *Flowchart:* non-linear registration of a histological image to a tissue block  
574 photograph. The target and source RGB images are flattened to grayscale during pre-processing, and MIND-  
575 filtered, yielding images with  $n=8$  channels. An 8-channel difference image is calculated by resampling the  
576 filtered source on the target domain and subtracting the filtered target. The non-linear transformation is  
577 parametrised as a dense array of displacement vectors ( $\mathbf{u}(\mathbf{x})$ ) over the target domain and is initialised to zero  
578 for all  $\mathbf{x}$ . Since the displacement vectors are optimised independently, diffusion regularisation is applied to  
579 prevent the source image from folding over itself and leading to a non-diffeomorphic mapping. Local updates  
580 to the displacement vectors are computed at every iteration by the Gauss–Newton optimiser, based on the 8-  
581 channel difference image (and its derivative) and the regularisation gradient that are supplied by the *Cost*  
582 and *Regulariser* objects. As a result of the optimisation, the resampled histology image (source) becomes  
583 maximally similar to the block photograph (target).

584

585 The flowchart in Figure 5 summarises the concluding step of stage 1: optimising *the non-linear*  
586 *transformation* (4). This step employs diffusion registration that was introduced by *Fischer*  
587 and *Modersitzki* [52, 60, 61] and further adapted for the  $SSD_{MIND}$  cost function by *Heinrich et*  
588 *al* [43]. Here we describe the optimisation process with a linear pre-alignment step, as it is  
589 implemented in TIRL. All equations below follow the denominator layout convention, and all  
590 vectors are column vectors unless otherwise stated.

591

592 The non-linear transformation is preceded by a sequence of linear transformations, which can  
593 be combined into a single affine transformation ( $\mathbf{A}$ ) that operates on homogeneous coordinates  
594 ( $\mathbf{x}$ ). (In TIRL, consecutive linear transformations are automatically replaced by the equivalent  
595 affine transformation to optimise the computation of new image coordinates). The non-linear  
596 transformation is parametrised as a deformation field  $\mathbf{u}(\mathbf{x})$ , that incurs additional displacement  
597 to the linear mapping of target coordinates ( $\mathbf{x} \in \Omega$ ) to source coordinates ( $\mathbf{x}' \in \Psi$ ):

598

$$\mathbf{x}' = \phi_p^{-1}(\mathbf{x}) = \mathbf{A}\mathbf{x} + \mathbf{u}(\mathbf{x}) \quad (9)$$

599

600 Given  $\mathbf{A}$ , the optimisation aims to find plausible values for  $\mathbf{u}(\mathbf{x})$  that together with  $\mathbf{A}$  minimise  
601 the overall difference between the MIND representation of the two images. Mathematically,  
602 this is equivalent to minimising the following cost functional:

603

$$C(\mathbf{u}) = \frac{1}{2} \int_{\mathbf{x} \in \Omega} \|\mathbf{m}_T(\mathbf{x}) - \mathbf{m}_H(\mathbf{A}\mathbf{x} + \mathbf{u}(\mathbf{x}))\|_2^2 d\mathbf{x} + \alpha \cdot \frac{1}{2} \int_{\mathbf{x} \in \Omega} \sum_{i=1}^d \|\nabla u_i(\mathbf{x})\|_2^2 d\mathbf{x} \quad (10)$$

604

605 where the first term is the cumulative Euclidean distance of MIND vectors representing image  
 606 dissimilarity within the target domain, and the second term is the so-called diffusion  
 607 regularisation penalty that is supposed to prevent unrealistic folds in the transformed source  
 608 image by penalising sharp gradients in each component ( $i = 1, \dots, d$ ) of the deformation field.  
 609 The  $\alpha$  parameter is a weighting factor that controls the relative importance of the regularisation  
 610 with respect to image dissimilarity.

611

612 The optimisation proceeds by iteratively computing vector updates ( $\mathbf{h}(\mathbf{x})$ ) of the deformation  
 613 field until the desired precision ( $\epsilon = 10\%$  of the pixel size) or the maximum number of iterations  
 614 ( $k_{\max} = 20$ ) is reached:

615

$$\mathbf{u}^{(k+1)}(\mathbf{x}) = \mathbf{u}^{(k)}(\mathbf{x}) + \mathbf{h}(\mathbf{x}), \quad \text{until} \quad \text{Median}_{\Omega}(\|\mathbf{h}(\mathbf{x})\|_2) < \epsilon \in \mathbb{R} \quad (11)$$

616

617 Using the discretisation in (11) we now aim to reformulate (10) such that it becomes linear  
 618 with respect to the updates. We therefore rewrite the argument of the dissimilarity term in (10)  
 619 using (11) and first-order Taylor expansion:

620

$$\mathbf{m}_T(\mathbf{x}) - \mathbf{m}_H(\mathbf{A}\mathbf{x} + \mathbf{u}^{(k)}(\mathbf{x})) - \nabla \mathbf{m}_H(\mathbf{A}\mathbf{x} + \mathbf{u}^{(k)}(\mathbf{x}))^T \mathbf{h}(\mathbf{x}) \quad (12)$$

621

622 As deformations grow larger, the linear approximation based on the originally computed  
 623 MIND vectors of the source image ( $\mathbf{m}_H$ ) becomes less accurate. To avoid this, we recompute  
 624 the respective MIND vectors at every iteration from the transformed source image, for which  
 625 we introduce the  $\tilde{\mathbf{m}}_H(\mathbf{x})$  notation:

626

$$\mathbf{S}_D(\mathbf{h}) \equiv \mathbf{m}_T(\mathbf{x}) - \tilde{\mathbf{m}}_H(\mathbf{x}) - \nabla \tilde{\mathbf{m}}_H(\mathbf{x})^T \mathbf{h}(\mathbf{x}) \quad (13)$$

627

628 The regularisation term is already linear with respect to  $\mathbf{h}(\mathbf{x})$ , because the differential operator

629  $\nabla = \left( \frac{\partial}{\partial x_1}, \frac{\partial}{\partial x_2} \right)^T$  is linear. Substituting (11) into the regularisation term of (10) yields:

630

$$\mathbf{S}_{R,i}(h_i) = \nabla u_i^{(k)}(\mathbf{x}) + \nabla h_i(\mathbf{x})$$

$$\frac{\alpha}{2} \int_{\mathbf{x} \in \Omega} \sum_{i=1}^d \|\nabla u_i(\mathbf{x})\|_2^2 d\mathbf{x} = \frac{\alpha}{2} \int_{\mathbf{x} \in \Omega} \sum_{i=1}^d \mathbf{S}_{R,i}(h_i)^\top \mathbf{S}_{R,i}(h_i) d\mathbf{x} \quad (14)$$

631

632 After substituting (13) and (14) into (10) we obtain the following linearised expression for the  
633 cost at the  $k$ -th iteration:

634

$$C^{(k)}(\mathbf{h}) = \frac{1}{2} \int_{\mathbf{x} \in \Omega} \mathbf{S}_D(\mathbf{h})^\top \mathbf{S}_D(\mathbf{h}) d\mathbf{x} + \frac{\alpha}{2} \int_{\mathbf{x} \in \Omega} \sum_{i=1}^d \mathbf{S}_{R,i}(h_i)^\top \mathbf{S}_{R,i}(h_i) d\mathbf{x} \quad (15)$$

635

636 To minimise the cost of the  $k$ -th iteration (15), we formulate the corresponding system of  
637 *Euler–Lagrange* equations for each spatial component of the deformation field ( $i = 1, \dots, d$ ):

638

$$\frac{\delta C^{(k)}(\mathbf{h})}{\delta h_i} - \sum_{j=1}^d \frac{\partial}{\partial x_j} \frac{\delta C^{(k)}(\mathbf{h})}{\delta h_{i,j}} = 0 \quad (16)$$

639

640 Expressing the functional derivatives in (16) yields the following system of equations ( $i =$   
641  $1, \dots, d$ ) for each pixel in the target domain:

642

$$\begin{aligned} & - \left( \frac{\partial \tilde{\mathbf{m}}_H(\mathbf{x})}{\partial x_i} \right)^\top \left( \mathbf{m}_T(\mathbf{x}) - \tilde{\mathbf{m}}_H(\mathbf{x}) - 2 \frac{\partial \tilde{\mathbf{m}}_H(\mathbf{x})}{\partial x_i} h_i(\mathbf{x}) \right) \\ & - \alpha \cdot \Delta u_i^{(k)}(\mathbf{x}) - \alpha \cdot \Delta h_i(\mathbf{x}) = 0_i \end{aligned} \quad (17)$$

643

644 where  $\Delta$  is the Laplace operator (discretised using a 4-point stencil on the 2D target grid). By  
645 rearranging (17), substituting  $\mathbf{S}_D$  from (13), and introducing the notation  $\nabla \mathbf{S}_D = \left( \frac{\delta S_D}{\delta h_1}, \frac{\delta S_D}{\delta h_2} \right)$  for  
646 the *Gateaux*-derivative, we obtain the following formula, which is equivalent to minimising  
647 the cost functional in (15) by the *Gauss–Newton* method [62], where  $\mathbf{h}(\mathbf{x})$  constitutes the  
648 update step:

649

$$(\nabla \mathbf{S}_D^\top \nabla \mathbf{S}_D - \alpha \cdot \Delta) \mathbf{h}(\mathbf{x}) = -(\nabla \mathbf{S}_D^\top \mathbf{S}_D - \alpha \cdot \Delta \mathbf{u}^{(k)}(\mathbf{x})) \quad (18)$$

650

651 Equation (18) is eventually solved simultaneously for all pixels in the target domain for  $\mathbf{h}(\mathbf{x})$   
652 using the sparse solver of SciPy [63]. After every iteration, the deformation field is updated  
653 according to Equation (11). At the end of the optimisation the estimated deformation field is  
654 used to initialise a new optimisation at a higher grid resolution and so forth. In our experiments,  
655 sufficient convergence was reached in 20 iterations at each of the 1.5 mm, 1 mm, 0.5 mm and  
656 0.25 mm resolution levels.

657

658 To test the accuracy of this stage, we registered H&E, ferritin- and PLP-stained histological  
659 images to 6 corresponding tissue blocks from various anatomical locations. We selected all  
660 available stains that exhibited visible grey-white matter contrast. The blocks were selected to  
661 represent the observed variability of the size, shape, and anatomical texture of the blocks in the  
662 full dataset. The pre-processed images were imported to TIRL, and the grayscale histological  
663 images were thresholded between 150 and 400 to remove shadows on the slide edge (inherent  
664 to slide scanning) and the white background. The histology image was further smoothed by a  
665 Gaussian kernel ( $\sigma = 0.1$  mm) partly because voxel-to-voxel variations due to staining cell  
666 nuclei are not represented in the block photo, and partly to prevent small holes arising from the  
667 thresholding creating a false texture that MIND is sensitive to. The resolution of the images  
668 was set to the resolution of the photograph, and image centres were moved to the origin. Before  
669 computing the MIND representation, the images were flattened to a single channel as described  
670 earlier.

671

672 The registrations were evaluated in terms of maximum and average registration error of  
673 overlapping contours. Grey-white matter contours were defined separately for the histology  
674 images and the block photos by manually annotating approximately 200 points for each image  
675 in Fiji [64]. Pairwise alignment of the contours was assessed after registering the images. To  
676 establish pairwise point correspondence between the contours, point coordinates were  
677 parametrised, and all contours were upsampled by B-spline interpolation to comprise exactly  
678 2000 points. The contours from the block photographs (target) were transformed into the  
679 domain of the corresponding histology images (source) by the transformation chain of the  
680 target images. In the histology domain two parameters were computed for every pair of  
681 contours: (1) the *Hausdorff distance*, and (2) the *median contour distance*. The former  
682 measures the maximum distance between corresponding contour points with the same index,  
683 yielding an estimate of the largest registration error. The latter is calculated by measuring the  
684 distance of each contour point from the closest point of the other contour and taking the median



685 of these measurements. As this measure is independent from point correspondence errors that  
686 arise from the manual nature of the segmentations, it provides a more realistic quantitative  
687 estimate of the overall registration error, which can be qualitatively observed by eye.

688

## 689 2.7. Stage 2: Tissue block to brain slice photograph

690

691 The second step of the automated registration pipeline maps the coordinates of the tissue block  
692 photograph (Figure 6F) to the domain of the brain slice photograph (Figure 6A). Given that the  
693 tissue block is significantly smaller than the whole-brain coronal slice, it is computationally  
694 more efficient to choose the tissue block as target, and the brain slice as source, as the latter  
695 will be repeatedly interpolated at the target domain as the optimisation proceeds. The vastly  
696 different size of the objects however also poses a registration challenge, as extreme oversizing  
697 or shrinkage of the block image can be a trivial solution to minimise SSD cost based on pixel  
698 intensities. Furthermore, most brain slice photos exhibit high degrees of self-similarity: a block  
699 with a certain anatomical pattern may be a relatively good fit at multiple positions. Without  
700 prior initialisation, this would require extensive spatial search or a very time-consuming global  
701 optimisation method to succeed, especially when multiple blocks must be registered to the  
702 same slice.

703

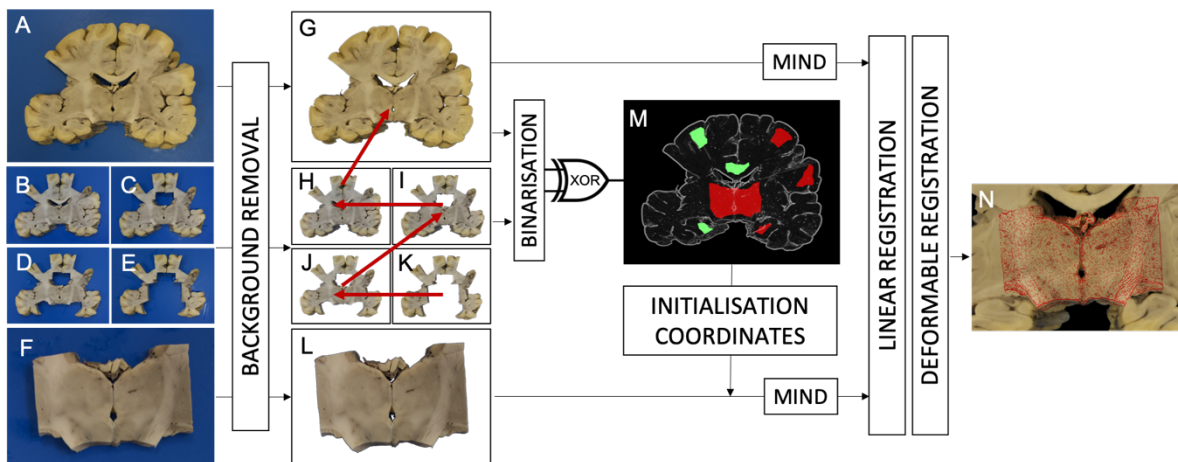

704

705 **Figure 6. Overview of stage 2: block-to-slice registration.** Registration of a coronal slice (A) to a tissue  
706 block (F). Auxiliary slice photographs (B-E) were taken every time that a new tissue block was sampled  
707 from the same coronal brain slice. The blue background was removed from the photographs using  $k$ -means  
708 classification of RGB vectors ( $k=2$ ). The segmented coronal slice (G) served as a common reference domain  
709 for affine registering all segmented auxiliary slices (H-K). Affine registered auxiliary slices were pairwise  
710 non-linearly registered in reverse order, starting with the most damaged slice (red arrows). The original  
711 coronal slice and the aligned auxiliary slices were binarized, and the XOR operation was applied to each

712 consecutive pair of them to identify non-matching areas as insertion sites (M). Following rigid initialisation  
713 at the centroid of each insertion site, the background-segmented block photograph (L) was affine registered  
714 at each site. At the site where the affine registration yielded minimum  $SSD_{MIND}$  cost, a non-linear  
715 deformation was also performed to achieve accurate alignment of the block with the intact brain slice photo  
716 (N).

717

718 To keep stage 2 automated and relatively fast, prior information is obtained from a series of  
719 autopsy photographs (“cut-out images” or “auxiliary slices”, Figure 6B-E) capturing the  
720 original brain slice (Figure 6A) after the excision of a tissue block (or multiple spatially-distinct  
721 blocks). These photographs are labelled in chronological order of the dissection process. Each  
722 cut-out image is affine registered to the original coronal image first, then consecutive pairs of  
723 the cut-out images are registered by a chain of affine and non-linear transformations. The  
724 registered images are binarized and the binary difference (XOR) is taken to identify possible  
725 “insertion sites” for the blocks (Figure 6M).

726

727 The registration of the consecutive slices follows the same scheme as in stage 1: with the former  
728 cut-out image as target, and the later image as source, the algorithm performs an initial rotation  
729 search, followed by pseudo-rigid, affine, and non-linear registrations. For the rotation search,  
730 we used NMI cost as it is computationally less demanding than MIND, and it proved to be  
731 robust enough for the purpose. For the rest of the process, we used  $SSD_{MIND}$ , which is more  
732 sensitive to texture. Furthermore, the scale parameters of the “pseudo-rigid” step were confined  
733 to the range 0.9 – 1.1 and the BOBYQA bounded optimisation algorithm was used to prevent  
734 the oversizing/shrinking of blocks with less salient anatomical pattern. To identify insertion  
735 sites, each of the registered images were binarized by clipping intensity values at 1, and the  
736 images were multiplied to create a segmentation of non-aligned parts. The segmentation result  
737 was eroded by 5 mm, and the centroid of all connected components above an area of 1 cm<sup>2</sup>  
738 were denoted insertion sites.

739

740 To register multiple blocks automatically to the same slice, the search for insertion sites was  
741 performed once, then each block was affine registered at each site. The affine registration that  
742 yielded minimum  $SSD_{MIND}$  cost at the end of this stage was used to initialise a non-linear  
743 registration step for further refinement, concluding stage 2 for each block.

744

745 2.8. *Stage 3: Brain slice photograph to MRI volume*

746  
747  
748  
749  
750  
751  
752  
753  
754  
755  
756  
757

In the final step of the pipeline, the 2D coordinates of the brain slice photograph are mapped into 3D MRI space. The choice of the brain slice as target and the MR image as source is obligatory, as the interpolation of a 2D image on a 3D domain would not only be extremely inefficient to perform at each iteration of the optimisation process, but is also ill-defined. Stage 3 instead makes gradual improvements to the position, orientation, in-plane deformation and out-of-plane curvature of the brain slice photograph and compares it with the MRI values that are resampled from the intersection of this warped 2D domain with the MRI volume. The four steps of stage 3 and the respective transformation chain are illustrated in Figure 7. These transformations were optimised in various combinations with gradually converging boundary constraints, which are described below for each step.

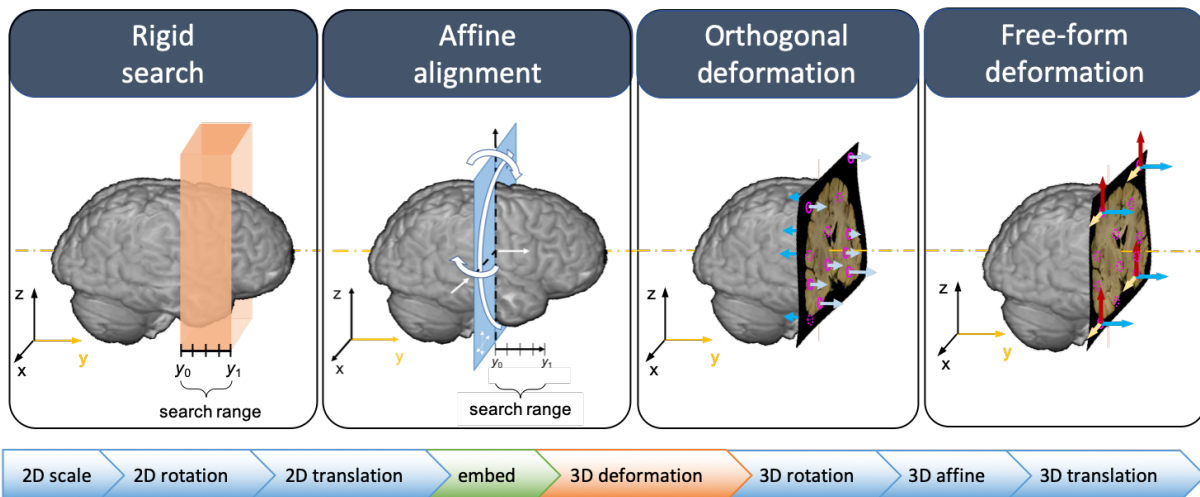

758  
759  
760  
761  
762  
763  
764  
765  
766  
767  
768  
769  
770  
771  
772

**Figure 7. Overview of stage 3: slice-to-MRI registration.** Panels from left to right: Consecutive steps of optimising different subsets of transformations in the transformation chain (*bottom bar*) of the brain slice photograph. *Rigid search*: a rectangular search volume is defined in MRI space by its centre, orientation and thickness (*orange slab*). The slice photograph is repeatedly initialised at various positions along the central axis of the slab, while the best 8-DOF (3D rigid + 2D scaling) alignment is sought. As the slices are coronal, their *z*-axis is initially aligned with the *y*-axis of the MRI. *Affine alignment*: 3D affine parameters are optimised to refine the linear registration. *Orthogonal deformation*: 50 control points (*pink*) are defined on the domain of the slice photograph. By dynamically changing the local protrusion/retraction of the slice at these points, the slice is slightly curved to compensate for off-plane distortions. Membrane energy is employed as a regularisation penalty to prevent sharp bending. *Free-form deformation*: the same 50 points are allowed to move freely in 3D space to compensate for in-plane deformations. (Arrows are shown only for a subset of the control points for better visibility.) In the last two steps, the displacements of the control points are constrained by membrane energy.

773 Step 1 aims to find the best rigid alignment of the brain slice image within a confined,  
774 approximately 2-cm thick rectangular search region in MRI space by iterating a 2D and a 3D  
775 bounded optimisation of  $SSD_{MIND}$  cost (using BOBYQA), namely Step 1A (2D scaling, 2D  
776 rotation, 2D translation) and Step 1B (2D scaling, 3D rotation, 3D translation). Both step 1A  
777 and step 1B are carried out twice at each resolution level (4 mm, 2 mm, 1 mm, 0.5 mm): first  
778 with slight Gaussian smoothing ( $\sigma = 1$  px), next without smoothing: [1A+1B]<sub>2</sub> The search  
779 region is most conveniently defined manually by its centre (3D coordinates), orientation (3D  
780 vector) and thickness (scalar), seven parameters altogether. In our case the standardised  
781 dissection strategy allows the definition of the slab automatically by slice number, given that  
782 all slices are coronal, separated by 1 cm along the anterior-posterior (A-P) axis of the brain,  
783 starting from the plane of the mamillary bodies toward the anterior and the posterior poles of  
784 the brain. The normal vector of the slab is collinear with the A-P axis, unless the brain is  
785 significantly tilted. Stage 1A and 1B are then performed with the same initial parameters at 5  
786 equally spaced points along the short axis of the search range, and the position with the least  
787  $SSD_{MIND}$  cost at the end is accepted as the best initialisation position for the slice. At this  
788 location, stage 1A and 1B is repeated for a final time, but the optimiser is changed from  
789 BOBYQA to its closest unconstrained equivalent, NEWUOA. In our experience, the rotation  
790 and scale parameters have a stronger influence on the cost function, therefore translation  
791 parameters are effectively only optimised late in the process after these two. Unconstrained  
792 optimisation by NEWUOA with the nearly optimal rotation and scale parameters allows  
793 escaping the current slab position that might have been reached with these parameters being  
794 suboptimal in the previous iterations. The result of this unconstrained optimisation is accepted  
795 as the best pseudo-rigid alignment of the slice photograph, which is then fed into step 2.

796

797 Step 2 aims to compensate for shears of the slice photograph and optimises the parameters of  
798 the 3D affine transformation. Given the pseudo-rigid alignment from step 1, the scale, rotation,  
799 and translation parameters are not expected to change substantially in this step, and strict  
800 bounds are set for these parameters in the BOBYQA optimiser.

801

802 Step 3 introduces deformations that are orthogonal to the slice photograph to account for the  
803 slightly irregular, non-planar nature of free-hand cuts through the brain. The assumption behind  
804 step 3 is that variations in the anatomical pattern of neighbouring slices due to off-plane  
805 deformation is a larger contributor to the misalignment after affine registration than in-plane

806 deformations are, as long as the resolution is coarse (4 mm, 2 mm). In-plane deformations are  
807 therefore not introduced until step 4. The transformation of step 3 is parametrised by  
808 orthogonal ( $z$ -axis) displacements at  $16 \leq N_c \leq 128$  control points (nodes) defined on the  
809 domain of the 2D brain slice photograph (Figure 7, panel 3). The number of points was  
810 determined empirically as a trade-off between registration accuracy and computation time. The  
811 displacements for the rest of the image domain are calculated from the known  $z$ -axis  
812 displacements using interpolation by a set of Gaussian radial basis functions ( $G(r, \sigma)$ ):  
813

$$u_z(\mathbf{x}) = \sum_{i=1}^{N_c} w_i G(\|\mathbf{x} - \mathbf{x}_i\|, \sigma) \quad (19)$$

814  
815 The  $\sigma$  parameter defines the effective radius of each node, and is set to the average Euclidean  
816 distance between all pairs of control points. The weight for each node is calculated by fitting  
817 the above equation for the predefined  $z$ -axis displacements at the control points. The parameters  
818 ( $z$ -axis displacements) of the transformation are optimised for minimum  $SSD_{MIND}$  cost using  
819 the NEWUOA algorithm. In addition to the  $SSD_{MIND}$  cost, a membrane energy regularisation  
820 term was included in the cost function to prevent sharp bends of the domain. Membrane energy  
821 was defined at any point  $\mathbf{x}$  of the target domain as the L2-norm of the second derivatives of the  
822 local deformation field, and summed over the entire domain to obtain the full regularisation  
823 term:  
824

$$E_{\text{membrane}} = \beta \cdot \sum_{\mathbf{x} \in \Omega} \sqrt{\sum_{i=1}^d \sum_{j=1}^d \sum_{k=1}^d \left( \frac{\partial^2 u_i}{\partial x_j \partial x_k} \right)^2} \quad (20)$$

825  
826 where  $\beta$  is a regularisation parameter that was set to  $10^{-8}$ .

827  
828 In step 4, we extend the transformation from the previous step such that deformations at each  
829 point of the target domain are simultaneously optimised along all three spatial dimensions. In  
830 addition to the in-plane deformations that naturally occur during handling the brain, through-  
831 plane deformations of step 3 also incur in-plane deformations by projecting 3D MRI data onto  
832 a regular 2D grid. The tangential deformation components ( $u_x, u_y$ ) are initialised to zero and  
833 calculated for all pixels of the target domain from the respective deformation components at

834 the control points throughout the optimisation. Previously optimised orthogonal deformations  
835 ( $u_z$ ) are retained, but may also change in step 4, rendering this final transformation a free-form  
836 deformation with restricted degrees of freedom that is dictated by the number of control points.  
837 Membrane energy regularisation was also used at this stage.

838

839 While the control points can be defined manually, to keep the pipeline automated, we generated  
840 quasi-random two-dimensional coordinates for the control points by drawing numbers from a  
841 sequence of rational fractions (Halton sequence [65]). The advantage of using Halton-sequence  
842 points versus a rectangular grid is that the points provide similar uniform coverage of the area,  
843 while the number of points can be set to any positive integer. This is important, because the  
844 complexity of the optimisation increases with the number of parameters, and for the same fine-  
845 grain control over the deformations, one would need more points in a regular grid layout than  
846 with Halton points. When compared to pseudorandom point placement, Halton points have the  
847 advantage of being deterministic (reproducible) and having low discrepancy (no two points are  
848 extremely close to each other). To restrict deformations to the area of the coronal brain slice  
849 (excluding most of the background), a bounding box was defined for the brain slice by Otsu-  
850 thresholding and it was expanded by 10% in each direction. The Halton points were finally  
851 scaled and shifted accordingly to fit inside the bounding box.

852

### 853 2.9. *Combining transformations*

854

855 Given all three previously described stages of the pipeline, there are two competing alternatives  
856 for combining them to achieve end-to-end MRI-histology registration. While these methods  
857 are equivalent in theory, they are slightly different in terms of their implementation in TIRL  
858 and their practical consequences.

859

860 The first method is forward mapping by concatenating the optimised transformation chains of  
861 the target images from each step (histology, block, slice). The practical consequence of this  
862 method is that the histology data is never interpolated (unless subsampled to a lower resolution  
863 at the start), and that histological coordinates can be mapped to MRI coordinates without the  
864 necessity to invert any of the optimised transformations. However, the deformations between  
865 MRI and the histology image can be large and may not be estimated accurately in every case  
866 by the combination of multiple non-linear transformations.

867

868 In the second method, instead of concatenating non-linear transformations, the registration  
869 converges at the half-way point, on the tissue block photograph. The optimised transformation  
870 chains from the second and third stages are concatenated, and the MRI data is evaluated on the  
871 domain of the block photograph by interpolation. The difference from the first method is that  
872 the histology data must also be evaluated on this domain by interpolation using the optimised  
873 transformation chain from the first stage. The main advantage of this method is that the non-  
874 linear transformations are not chained, consequently the registration error incurred by each of  
875 them is not amplified by the other, which means that the final alignment can be more accurate.  
876 The practical consequence of this method is that the original histological coordinates cannot  
877 be mapped to MRI space without inverting a non-linear transformation, the precision of which  
878 may be affected by the inverse consistency error [57].

879

880 For the practical purpose of correlating MRI and histology parameters in a predefined region  
881 of interest, the limitation of the second method is not relevant as long as pixels from the images  
882 can be overlaid at any desired resolution. We therefore adopted the second method to achieve  
883 greater precision in estimating tissue deformations.

884

### 885 **3. Results**

886

#### 887 *3.1. Stage 1 results: Histology image to tissue block photograph*

888

889 The accuracy and robustness of stage 1 was tested on 6 tissue blocks from various anatomical  
890 regions of the same human brain: (1) the orbitofrontal cortex, (2) the anterior cingulate cortex,  
891 (3) the anterior limb of the internal capsule (also including parts from the caudate nucleus and  
892 the putamen), (4) the hippocampus, (5) the thalamus, and (6) the visual cortex at the banks of  
893 the calcarine fissure. Each of the blocks had corresponding histological sections stained with  
894 H&E, for ferritin and for PLP. (1) and (6) were further stained with LFB+PAS. The rest of the  
895 immunohistochemistry images were not considered for registration with the tissue block  
896 photograph, as they exhibited virtually no grey-white matter contrast. Registrations also were  
897 performed with various regularisation weights (0.2 – 2.0) to test the effect of regularisation on  
898 registration accuracy.

899

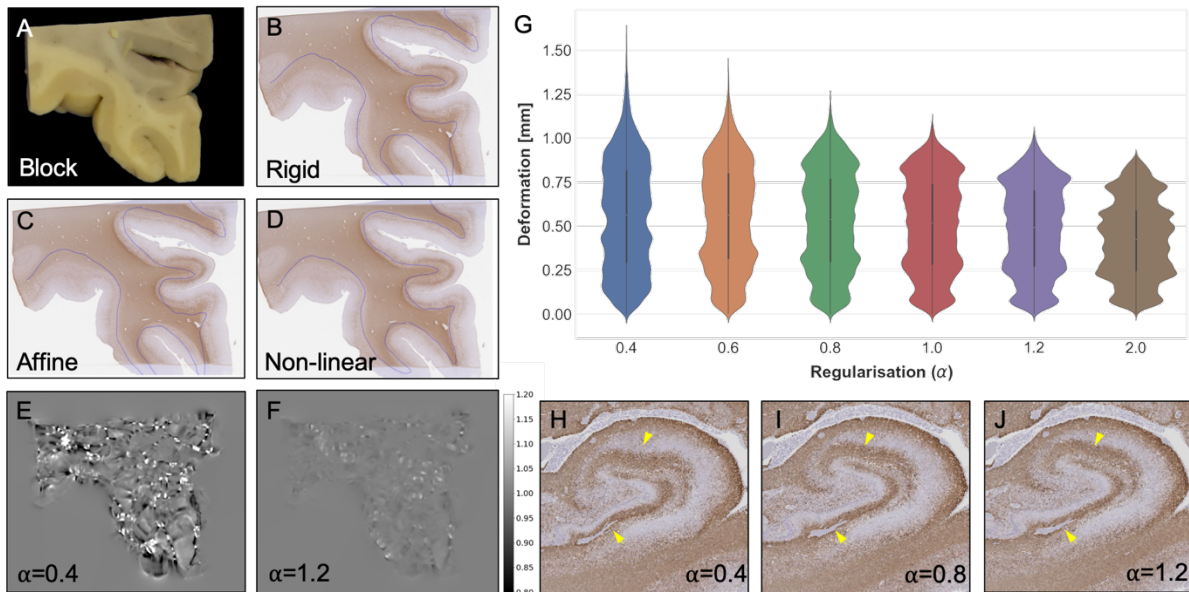

900

901 **Figure 8. Results of stage 1 (histology-to-block registration).** (A) Photograph of the posterior surface of a  
902 tissue block from the left orbitofrontal cortex (OFC) that was used as the target image for the registration of  
903 the corresponding histological image. (B-D) PLP-stained histology image of the same region shown with the  
904 transformed overlay (*blue curve*) of the manually defined grey-white matter contour of the block photograph  
905 after each registration step. The registration accuracy is gradually improved by each consecutive step of the  
906 optimisation (pseudo-rigid, affine, non-linear) as evidenced by better alignment between the overlay and the  
907 grey-white matter boundary of the histological image. (E) The Jacobian map of the non-linear transformation  
908 over the OFC indicates large (beyond 20%) local shrinkages and dilations for  $\alpha = 0.4$ . (F) The Jacobian  
909 map for  $\alpha = 1.0$  over the OFC shows physically plausible shrinkage and dilation (both  $\sim 20\%$ ) of the tissue.  
910 (G) Typical in-plane deformations in millimetres as a function of regularisation weight for the registration  
911 shown in A-D. Increasing the regularisation weights restricts implausible large local deformations that is  
912 seen as a reduction of the upper tail. (H-J) Distortions shown on the PLP-stained histology image of the  
913 hippocampus as a function of the regularisation weight ( $\alpha$ ). Too little regularisation ( $\alpha = 0.4$ ) yields jagged  
914 appearance of the anatomical contours after registration (*yellow arrowheads*), whereas regularisation  
915 weights above 0.8 yield physically plausible, almost identical results.

916

917 Figure 8A-D shows a representative example how the rigid, affine and non-linear  
918 transformations gradually improved the registration accuracy between the histological image  
919 and the tissue block photo during stage-1 registration. To gauge the plausibility of the non-  
920 linear transformations associated with different regularisation weights, the Jacobian  
921 determinant maps were plotted in Figure 8E-F for a small ( $\alpha = 0.4$ ) and a larger ( $\alpha = 1.2$ )  
922 regularisation weight. At each pixel, the Jacobian determinant describes the local  
923 shrinkage/dilation of the image elements by the non-linear transformation. The range of the  
924 Jacobian values was 0.1 – 2.5 for  $\alpha = 0.4$  and 0.8 – 1.2 for  $\alpha = 1.2$ . As none of these values



925 were below zero, the diffeomorphic nature of the transformation was preserved: no image  
926 elements were lost by abnormal self-folding of the image in either case. However, in the under-  
927 regularised case, the sharp transitions between large local deformations are most likely driven  
928 by local intensity variations in the images, pointing at the non-physical nature of this  
929 transformation. On the contrary, in the more regularised case the deformations were smaller,  
930 more balanced and more homogeneous, reflecting actual tissue deformations. This effect is  
931 further evidenced by the violin plot in Figure 8G, which shows the distribution of deformations  
932 (in millimetres) versus regularisation weight. Irrespective of the regularisation weight, the  
933 deformations were roughly evenly distributed between 0 and 1 mm, which seems a physically  
934 plausible estimate for the magnitude of tissue deformations (the deformations of the  
935 background were excluded). Increasing the regularisation weight restricted large local  
936 deformations, which is seen as a reduction of the heavy tail in the plots of Figure 8G.

937

938 Under-regularised stage-1 registration distorts anatomical contours (Figure 8H), which is hard  
939 to notice unless compared against the result of well-regularised registrations (Figure 8I-J).  
940 Minor inaccuracies like this are almost undetectable by eye or even by comparing grey-white  
941 matter contours. Nevertheless, the deformation field carries an additional rotation component  
942 ( $\text{curl } \mathbf{u}(\mathbf{x})$ ) around the distorted regions. This may locally bias the histology-derived fibre  
943 orientations and insidiously reduce the correlation with MRI-derived fibre orientations even  
944 when the registration appears grossly accurate. For direction-sensitive applications it is  
945 therefore recommended to set  $\alpha$  as high as reasonably possible, even at the expense of a slightly  
946 higher overall registration error. In our experiments, we observed no obvious anatomical  
947 distortions for  $\alpha > 0.8$ .

948

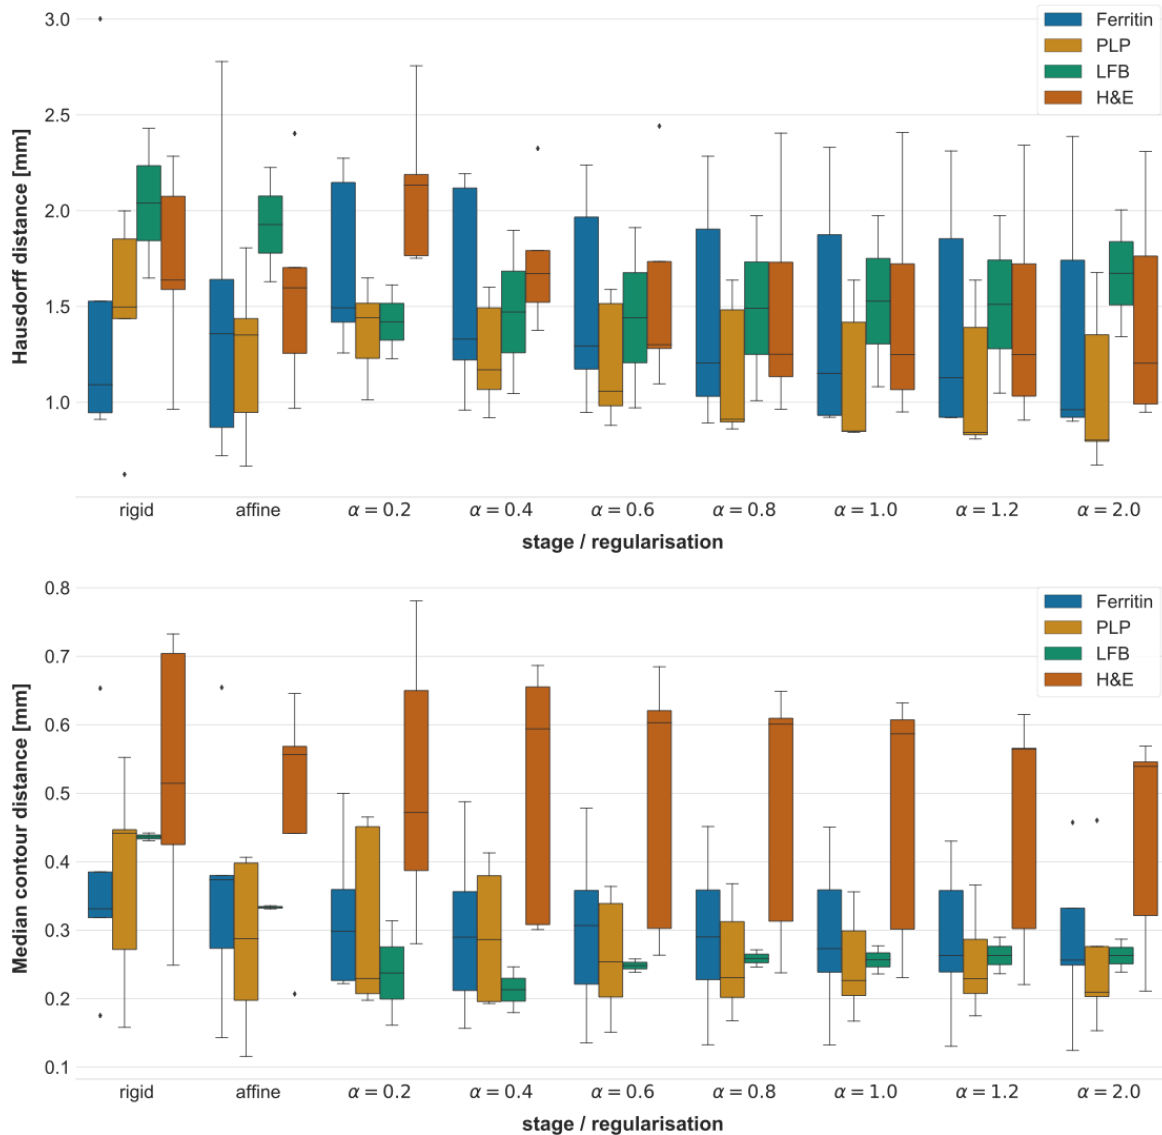

949

950 **Figure 9. Accuracy of stage 1 (histology-to-block registration).** The boxplots show the *Hausdorff-*  
 951 *distance* (*top*) and the *median contour distance* (*bottom*) between the grey-white matter contours of the  
 952 registered images. Both distances are reported in millimetres for each step of the registration (including  
 953 multiple regularisation weights for the non-linear step) and for each histological stain ( $n=6$ , except for LFB  
 954  $n=2$ ). Indicated on the bars are the median, the interquartile range and the extrema of these measures. The  
 955 Hausdorff-distance is a biased estimator of the largest registration error (cf. text in *section 3.1*), whereas the  
 956 median contour distance is a more accurate representation of the visually perceived accuracy of the  
 957 registration. Based on the latter measure, the most consistent registration results could be obtained with the  
 958 LFB stain, the most accurate results with the PLP stain, and the most inaccurate results with the H&E stain.  
 959

960 Figure 9 shows the accuracy of stage-1 registration in terms of the two distance measures for  
 961 each histological stain, for each optimisation step (rigid, affine, non-linear), and for multiple  
 962 regularisation weights (0.2–2.0). *Hausdorff*-distances were generally larger (1.0–2.5 mm) than

963 the perceived registration error, which was more accurately captured by the median contour  
964 distance (0.2–0.7 mm). The reason is that the former strongly depends on accurate point  
965 correspondence between the contours, which cannot be guaranteed given the irregularities of  
966 hand-segmentation and the resultant difference in the length of the contours.

967

968 As evidenced by median contour distances, the rigid, affine and non-linear steps of the  
969 registration gradually improved the alignment of the tissue block photo with the PLP, LFB and  
970 ferritin-stained histological images, and the accuracy of the registration was similar for all three  
971 stains (0.2–0.3 mm). However, the same improvement was not seen with the H&E sections,  
972 for which the best results were achieved with the rigid alignment (0.4–0.7 mm). This is most  
973 likely explained by the grey-white matter contrast that was high with the former three stains,  
974 and almost absent in H&E stained sections. Based on these results, successful stage-1  
975 registration requires at least one stained section for each region of interest that has comparable  
976 contrast properties to the MRI image. The rest of the histological sections can then be registered  
977 linearly to this section.

978

979 Based on the median contour distances, the most consistent results could be achieved with  
980 LFB+PAS-stained sections. In the physically plausible regularisation range ( $\alpha > 0.8$ ) the  
981 accuracy was consistently 0.25–0.28 mm. Slightly more accurate registrations could be  
982 achieved with the PLP stained sections, where the best results (0.20–0.28 mm) were obtained  
983 with  $\alpha = 2.0$  regularisation. The best results with the ferritin-stained sections (0.25–0.34 mm)  
984 were also obtained using  $\alpha = 2.0$  regularisation.

985

986 While running stage 1 registration, we encountered a few unexpected results. Most notably, the  
987 sample from the anterior cingulate was too large for a standard histological slide (25 x 75 mm),  
988 and the superior portion of the tissue had been removed with a straight cut, which created a  
989 structural discrepancy between the histological image and the tissue block photograph. We  
990 tried changing the resolution steps, as well as the amount of regularisation of the non-linear  
991 registration step, but ultimately the problem could only be reliably resolved by masking out the  
992 extra tissue from the target image using a hand-drawn mask. Using the mask, the registration  
993 produced excellent results with the default set of parameters and 0.8 regularisation weight.

994

995 We also noticed that the block with the anterior limb of the internal capsule had less salient  
996 anatomical features than other samples. While the orientation of other samples was correctly  
997 identified by a quick 4-direction rotation search, the registration of this sample did not succeed  
998 until a full search with  $10^\circ$  increments was conducted, therefore we strongly suggest adhering  
999 to this stricter routine for improved robustness.

1000

### 1001 3.2. Stage 2 results: Tissue block to brain slice photograph

1002

1003 One particular observation that we made at this stage is that most blocks with sufficiently  
1004 salient anatomical features (5 out of the 6 tested) could be equally well registered using the  
1005 computationally less expensive SSD cost function and the unconstrained NEWUOA optimiser  
1006 instead of the standard  $SSD_{MIND}$  and BOBYQA that we described in section 2.7. Therefore, in  
1007 Figure 10A we show the counterexample where the relative absence of anatomical features led  
1008 to overscaling with these settings, and the improved results using constraints are shown in  
1009 Figure 10B. As long as parameters are unconstrained, and the background area of the block  
1010 photograph is masked, downscaling the unmasked area is a trivial solution for the optimiser to  
1011 reduce the cost, giving rise to the risk of overscaling. In the rest of the cases this was not  
1012 observed, and we attribute this to the presence of anatomical features that when mismatched  
1013 between source and target, have a strong impact on the cost function, effectively constraining  
1014 parameters to their optimal range. This argument is supported by the fact that using  $SSD_{MIND}$   
1015 as the image similarity metric and setting the optimisation bounds on the scale parameters to  
1016 the range 0.9 – 1.1 (as described in section 2.7) led to uniform high-quality registration to the  
1017 corresponding brain slice photograph in the case of all 6 blocks. (Figure 10B-E).

1018

1019 Using these parameters, the accuracy of stage 2 was evaluated by visual comparison of the  
1020 registered blocks and the underlying brain slice photographs using animations that showed both  
1021 images in quick iteration. (The animations can be viewed in the Supplementary material.) We  
1022 observed virtually no shift or distortion in the anatomical pattern of the blocks in the  
1023 animations, indicating a degree of registration accuracy that likely surpasses the accuracy of  
1024 placing landmarks to quantify the registration error. Based on our observations, the registration  
1025 error incurred in this stage is negligible relative to that of the other two stages.

1026

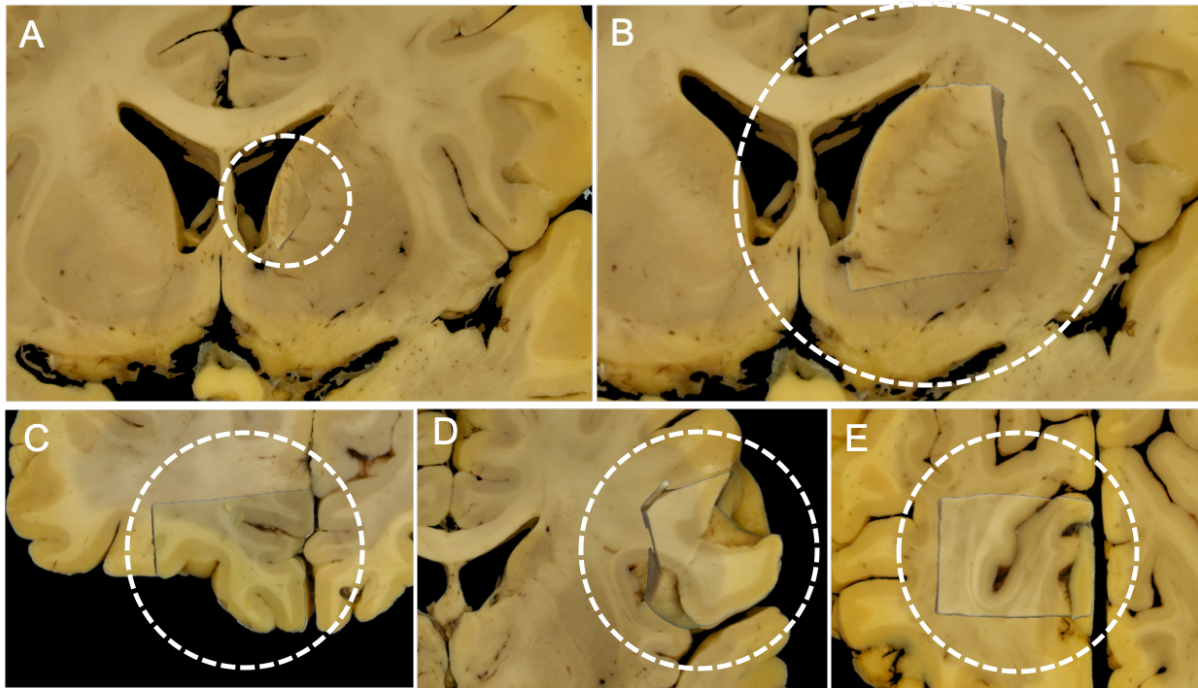

1027

1028 **Figure 10. Results of stage 2 (block-to-slice registration).** (A) Example of overscaling: as long as the  
1029 background is masked, reducing the unmasked area is a trivial solution to reducing the cost on a tissue block  
1030 that does not have enough salient features to constrain the registration (anterior limb of the internal capsule).  
1031 The misregistration occurred with SSD cost and unbounded optimisation of the linear parameters. (B)  
1032 Correct registration of the same block after setting the optimisation bounds on the scale parameters to (0.9–  
1033 1.1) and using MIND as the cost function. (C–E) Correct registration of various other blocks: orbitofrontal  
1034 cortex, Broca's homologue area (right hemisphere), visual cortex at the banks of the calcarine fissure.

1035

1036 Possible modes of failure at stage 2 are that either (1) insertion sites are incorrectly identified  
1037 on the basis of registering cut-out images, or (2) a specific tissue block is assigned to a different  
1038 insertion site. Both of these would lead to catastrophic misregistration. In our experiments we  
1039 never encountered a problem with the identification of the insertion sites. Even if this would  
1040 happen in the future, as a last resort the pipeline allows insertion sites to be defined manually  
1041 by voxel coordinates. We occasionally encountered the second problem when we used NMI as  
1042 the cost, and more often when the background of the tissue block image was not masked out,  
1043 or when the insertion site testing (affine registration) was performed at a coarser resolution,  
1044 and the associated final cost was calculated and compared with that of other sites at full  
1045 resolution. However, strict adherence to the protocol described in *section 2.7* produced high-  
1046 quality stage-2 registrations for all tested brain slices (n=6). In a separate experiment we also  
1047 confirmed that the stage-2 algorithm could successfully insert even as many as 6 different  
1048 blocks into the same coronal slice without misregistration (images not shown).

1049

1050 3.3. *Stage 3 results: Brain slice photograph to MRI volume*

1051

1052 The accuracy of registering brain slice photographs to whole-brain MRI was tested using both  
1053 simulated and real-life images.

1054

1055 3.3.1. *Experiment with simulated brain slice images*

1056

1057 The accuracy of slice-to-volume registration was first tested on simulated data. Using TIRL,  
1058 we defined a two-dimensional sampling domain in MRI space. The sampling frame was  
1059 translated along the anterior-posterior axis of the MRI volume to create three sets of synthetic  
1060 brain slice images at five equidistant points along the anterior-posterior axis: (1) *straight*  
1061 *coronal slices* (no additional transformation), (2) *oblique coronal slices* (additional 3D rotation  
1062 by Euler angles in the range  $-10^\circ$ – $10^\circ$ ), (3) *warped coronal slices* (additional  $z$ -axis  
1063 deformations up to 6 mm according to the 2<sup>nd</sup>-order polynomial  $P(x - x_0, y - y_0)$ , where  
1064  $(x_0, y_0)$  is the intersection of the slice with the anterior-posterior brain axis). Each synthetic  
1065 brain slice image was subsequently registered back to the volumetric MRI data using stage 3  
1066 of the pipeline. A binary brain segmentation mask was created for each slice to define a region  
1067 of interest, in which the mean registration error was evaluated by comparing the original and  
1068 the registered locations of each point. Given that we register MRI to MRI in this task, the  
1069 optimisation does not have to account for contrast differences between the source and target  
1070 images as it would normally do. We nevertheless see this as a reasonable compromise to obtain  
1071 ground truth data that the stage-3 approach can be tested against, and the results may be  
1072 interpreted as ideal limits that the registration approaches with photographs or histology  
1073 sections that mimic the MRI contrast.

1074

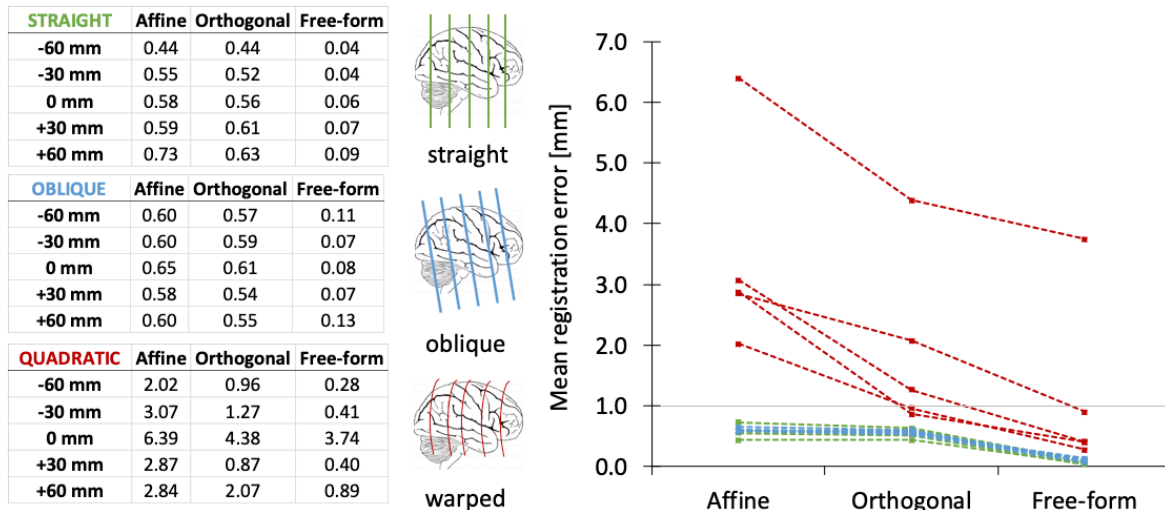

1075

1076

1077

1078

1079

1080

1081

1082

1083

1084

1085

1086

1087

1088

1089

1090

1091

1092

1093

1094

1095

1096

1097

1098

**Figure 11. Accuracy of stage 3 (slice-to-volume registration) based on simulated brain slices.** Three sets of simulated slices were created by resampling the MRI data along straight (*green*) and oblique (*blue*) coronal planes at 5 different locations along the sagittal axis, as well as slightly curved (*red*) coronal sections using 2<sup>nd</sup>-order polynomial transformation of the sampling domain. Consecutive optimisation steps of stage 3 gradually improved the alignment in all cases, leading to sub-millimetre final registration errors in all but one case. The one case that could not be registered by stage 3 had initial deformations larger than 6 mm, corresponding to a very poorly executed brain cut.

Figure 11 shows the mean registration error after each optimisation step of stage 3. We found that the rigid and affine steps alone could register straight and oblique slices with a 0.6 mm mean registration error, which is equivalent to 1.2 voxels in MRI space. As expected for straight slices, orthogonal deformations did not make any improvement, but free-form deformation was able to take the mean registration error (0.06 mm) well below the voxel size. For warped slices, we observed a difference in the registration accuracy based on how accurate the rigid and affine stages were. In four out of five cases, the first two stages (rigid + affine) were able to achieve affine alignment with a mean registration error of 2-3 mm, which corresponds to the average deformation in these slices, suggesting that the best possible affine alignment was reached. The orthogonal and free-form registration steps both made gradual improvements, yielding a final mean registration error of 0.495 mm. In one out of the five polynomial cases, the best affine alignment could not be achieved by the linear registration steps, and the mean registration error at this stage was more than 6 mm, which would correspond to a very poorly executed brain cut. While this case shows the limits of what is achievable with stage 3 slice-to-volume registration, it is a very generous limit: if cut surfaces

1099 have elevations less than or equal to 3 mm on average, slice-to-volume registration with the  
1100 presented method should be accurate to the size of a single voxel.

1101

### 1102 3.3.2. *Experiment with real brain slice images*

1103

1104 To test whether our method can achieve similar registration performance on real-life images as  
1105 well, we registered 5 coronal brain slice photographs, and visualised the accuracy of the  
1106 registration in two complementary ways. First, we wanted to know whether in-plane  
1107 deformations can be accurately compensated. Figure 12 shows a representative result with the  
1108 manually segmented grey-white matter boundary of the brain slice photograph overlaid on the  
1109 registered and resampled MR images after each step of the stage-3 slice-to-volume registration.  
1110 The registration in this particular case was further complicated by damage to the coronal slice  
1111 (Figure 12A, *asterisk*), as it was photographed after parts of the primary motor and sensory  
1112 cortices had already been removed. We found that the contours were generally well-matched  
1113 by the linear steps, with the largest offsets seen in the regions corresponding to the left and the  
1114 right lateral sulci and temporal lobes. The orthogonal deformation step introduced a curvature  
1115 of the brain slice along the left-right axis (Figure 12F), effectively shifting the cross section of  
1116 an adjacent gyrus out from what is seen as subcortical white matter of the right hemisphere  
1117 (right-hand side) in the photo (Figure 12B-C, *yellow arrow in the top row*), as well as fixing  
1118 the alignment of the left hippocampus (Figure 12B-C, *yellow arrow in the inset*). While small,  
1119 these changes are the most important from the perspective of a quantitative analysis: a  
1120 registration method that had not corrected for out-of-plane deformations would have led to  
1121 accidentally comparing quantitative data between grey and white matter in these regions. As  
1122 an unwanted consequence of introducing slice curvature, the right hippocampal region was  
1123 slightly shifted off the cutting plane by 1 voxel. (Later in *section 3.5* we will introduce a post-  
1124 hoc adjustment stage to compensate for local offsets like this.) After the free-form deformation  
1125 step we observed almost perfect alignment of the contours, with the largest misalignment being  
1126 0.3 mm (Figure 12D, *purple arrow*). The quantitative deformation maps in Figure 12E-G show  
1127 that after all registration steps, the magnitude of in-plane deformations was on the order of  
1128 2 mm, whereas out-of-plane deformations were on the order of 2-4 mm for the majority of the  
1129 slice area. The largest out-of-plane deformations (4-6 mm) were seen around the damage to the  
1130 slice, but our method was able to effectively compensate for these as well. According to the  
1131 Jacobian map, transformations were diffeomorphic with a maximum of 8% dilation/shrinkage  
1132 of the pixels.



1133

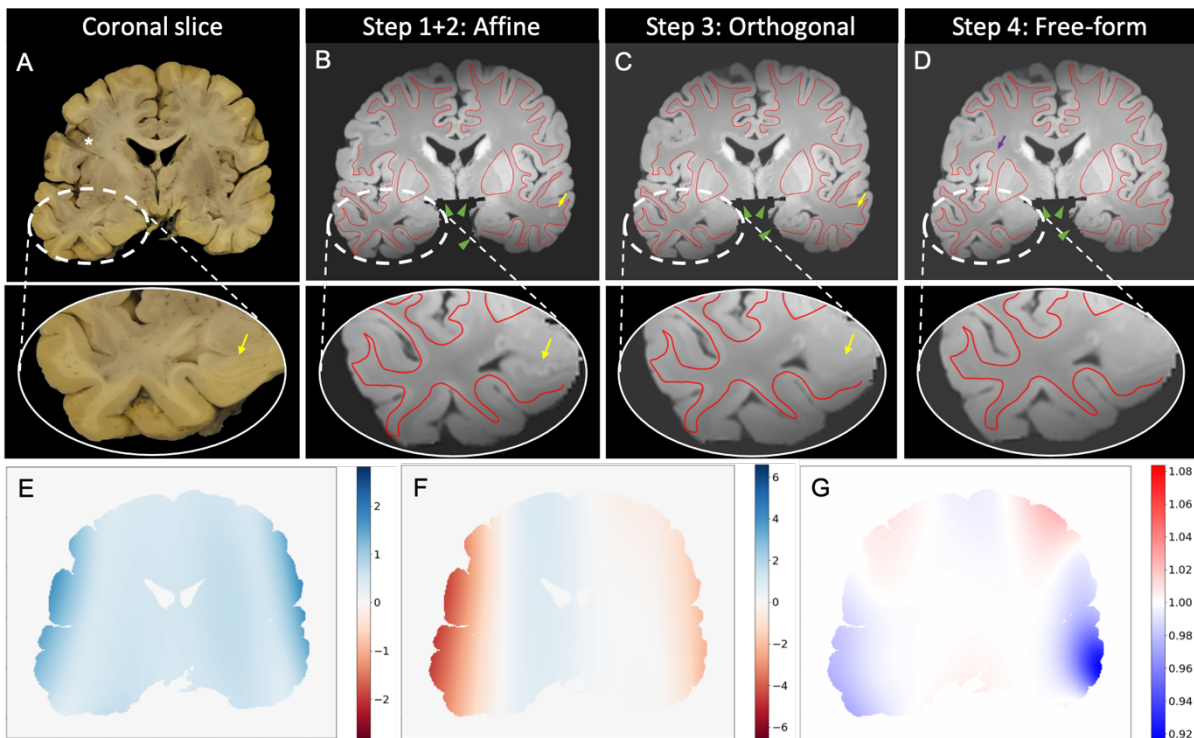

1134

1135 **Figure 12. Result of stage 3 (slice-to-volume registration) on an actual brain slice image (not**  
 1136 **simulations).** (A) Reference image used as a target of slice-to-volume registration (posterior view). The  
 1137 *asterisk* highlights an area where the slice was damaged due to advance resection of the primary motor and  
 1138 sensory cortices. The *yellow arrow* points at the cross section of the left hippocampus that will be misaligned  
 1139 after affine registration. (B) Correspondence between grey-white matter contours of the brain slice  
 1140 photograph (*red curve*) and the resampled MR image after affine alignment. While most of the contours  
 1141 match, as expected for a planar cut, large misalignments are seen in the region of the temporal lobes (*white*  
 1142 *dashed ellipse*). The *green arrowheads* point at the artificial boundaries as a result of removing the  
 1143 cerebellum by BrainSuite 18. The *yellow arrows* highlight regions that are misaligned after affine  
 1144 registration due to off-plane distortions of the slice relative to the cut surface: the left hippocampus, and a  
 1145 cross section of a gyrus in the subcortical white matter in the right temporal lobe. (C) Successful correction  
 1146 of the gyral and left hippocampal cross sections after the orthogonal deformation step (*yellow arrows*). In-  
 1147 plane deformations of the temporal regions are not yet compensated (*inset*). (D) Successful compensation of  
 1148 in-plane deformation after the final free-form registration step. The *purple arrow* shows the largest  
 1149 misalignment, measured as 0.3 mm. (E) Final in-plane deformations of the slice, showing a typical range of  
 1150 0-2 mm. (F) Final out-of-plane distortions, which are seen to be as high as 4-6 mm, especially where the  
 1151 brain slice is damaged. The curvature of the slice is very prominent along the transverse (left-right) direction.  
 1152 (G) Jacobian map showing diffeomorphic transformations after final step with  $\pm 8\%$  shrinkage/dilation of  
 1153 pixels.

1154

1155 Beyond comparing the alignment of grey-white matter contours in the registration plane, we  
1156 wanted to characterise how accurately our method was compensating out-of-plane distortions  
1157 of the brain slice, as this has not been addressed by previous literature. For one of the slices,  
1158 we manually annotated 20 anatomical features in MRI space that visually corresponded to the  
1159 anatomical features in the respective brain slice photograph and measured the distance of these  
1160 points from the registered slice in MRI space. The measured distances followed a chi-  
1161 distribution with a median of 0.93 mm and an interquartile range of 0.37 – 1.31 mm. This result  
1162 should be interpreted with care, as the reliability of the annotation cannot be guaranteed in  
1163 certain regions of the brain, where the anatomy is fairly consistent across several consecutive  
1164 slices. Precise annotation in these regions requires experience and also carefully choosing the  
1165 slicing orientation of the MRI volume. In our experience, even a rotation as small as  $10^\circ$  about  
1166 one of the axes was enough to render the observable anatomy visibly very different from what  
1167 was depicted in the slice photo, making the annotation process consequently very difficult. In  
1168 this particular experiment, most error readings had sub-millimetre magnitude, except for 8 of  
1169 the 20 that were larger than 1 mm.

1170

1171 To better understand the source of the registration error around these manual landmarks, we  
1172 carefully inspected the registration result in these regions. The coordinates of the manual  
1173 landmarks were fed into the stage-3 interpolator (as if they were the control points) to  
1174 reconstruct a curvilinear slice from the MR volume (“manually registered slice”).  
1175 Corresponding regions of the manually and the automatically registered MR slices were  
1176 visually compared with the original slice photograph where the apparent registration error was  
1177 large (Figure 13). Surprisingly, at nearly all of these locations (6 out of 8) the automated  
1178 registration method was more accurate than manual annotation. This finding is important,  
1179 because it shows that manual MRI slice matching by visual comparison with a 2D image is not  
1180 accurate, yet it is seen as common practice where suitable software/hardware solutions for  
1181 accurate MRI-histology registration are not readily available. Counterexamples (shown in the  
1182 supplementary material), where the accuracy of the automated method was inferior to that of  
1183 the manual landmarks were exclusively found in two cases on the edge of the brain. One of  
1184 them was in the proximity of the damaged area, and the other was in a region where the pial  
1185 surface was visible beneath the cutting plane (“side surface” of the brain slice) and locally  
1186 biased the registration towards larger out-of-plane distortions. The accuracy of slice-to-volume  
1187 registration in these regions could therefore benefit further from segmenting and masking side  
1188 surfaces in brain slice photographs.

1189

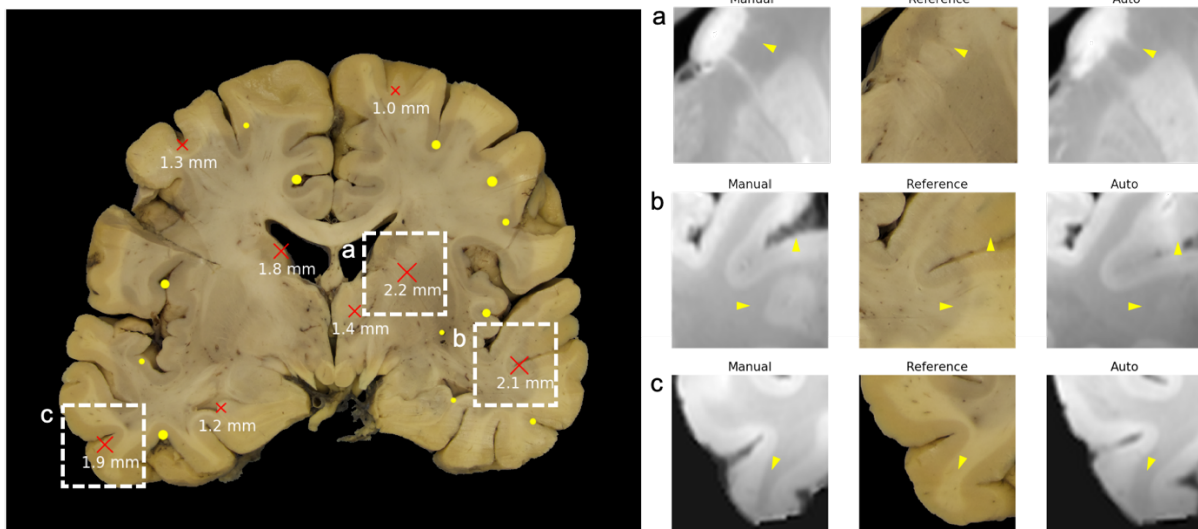

1190

1191 **Figure 13. Comparison of stage-3 registration result with registration by manual landmarks. Left:**

1192 Manually annotated MRI landmarks projected to the brain slice photograph. The size of the markers is  
1193 proportional to the distance of the landmarks from the cut surface estimated from slice-to-volume registration  
1194 by stage 3 of the pipeline. Landmarks shown as *yellow dots* are within 1 mm proximity of the surface,  
1195 landmarks shown as *red crosses* are further away. Distance values for the latter are shown in millimetres.

1196 **Right:** Visual comparison between 2D MRI reconstructions around the manual landmarks, the reference  
1197 image, and the result of stage-3 registration at three different positions (*a, b, c*) within a single slice. Careful  
1198 inspection of the reconstructed MRI images reveal that the automated result is more accurate (*yellow*  
1199 *arrowheads*), therefore the measured large distances are more indicative of annotation error than registration  
1200 error, due to ambiguities in slice depth localisation.

1201

### 1202 3.3.3. Slice-to-volume registration of damaged brain slices

1203

1204 After testing stage 3 on 5 slices, we successfully ran it on a total of 143 slices from 15 brains  
1205 with identical high-quality results. The few occasions when the automatic slice-to-volume  
1206 registration failed was due to some form of extreme structural discrepancy between the slice  
1207 photograph and the MRI, which include: (1) significant amounts of missing tissue (cerebellum,  
1208 M1S1 tissue block) or extra tissue (e.g. dislocated choroid plexus), (2) visible cortical or  
1209 ventricular surfaces in the slice photograph beneath the cutting plane (“side surfaces” of the  
1210 coronal brain slice), and (3) large local displacements such as the closing or the opening of the  
1211 interhemispheric fissure as a result of one hemisphere moving toward or away from the other  
1212 one.

1213

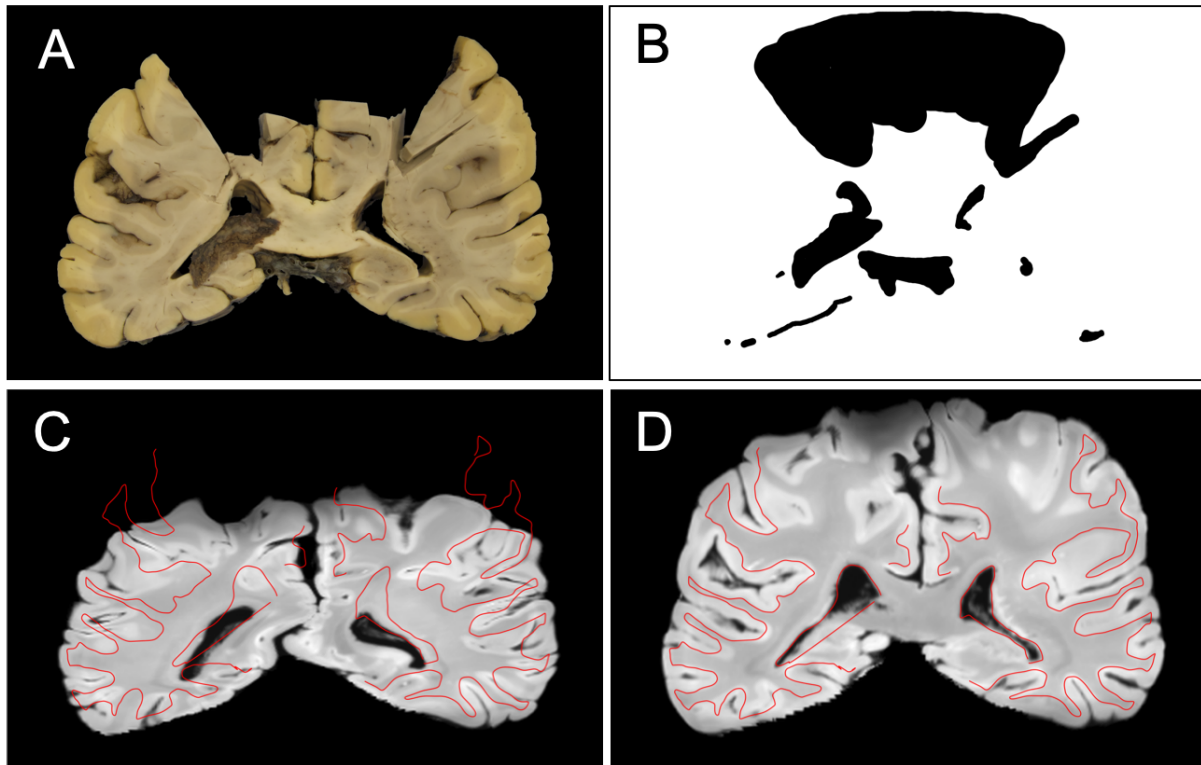

1214

1215 **Figure 14. Result of slice-to-volume registration of a severely damaged coronal brain slice. (A)** Coronal  
1216 brain slice photograph with bilateral hiatus in the sensorimotor regions. **(B)** A hand-drawn binary mask for  
1217 cost-function weighting. **(C)** Registration result without using the target mask. The *red curve* is an overlay  
1218 of the manually segmented grey-white matter contour of the brain slice photograph. **(D)** Registration result  
1219 with the hand-drawn target mask. The accuracy of the corrected registration is qualitatively similar to that  
1220 on non-damaged slices, but misalignments are slightly larger in the proximity of the masked regions due to  
1221 the relative absence of driving features.

1222

1223 In all cases, the problem of missing tissue was successfully addressed by creating hand-drawn  
1224 masks (Figure 14B) for the target image (slice photo), which recovered the registration  
1225 accuracy for most of the unmasked regions, but lead to larger deviations closer to the masked  
1226 region due to lack of supporting features (Figure 14). We found that the problem of side  
1227 surfaces could be most effectively addressed by taking photographs of both sides of the brain  
1228 slices and registering the one with less side surfaces visible. Alternatively, masks can be  
1229 generated automatically for side surfaces by affine registering the images of adjacent slices that  
1230 display the same cut surface, segmenting non-matching regions and adding them to the target  
1231 mask. The problem of hemisphere separation only affected a few slices in our case, and we  
1232 resorted to registering hemispheres separately in these cases.

1233

1234 3.4. *Combining stages 1-3: histology-to-MRI registration*

1235

1236 To achieve end-to-end histology-to-MRI registration, we combined the histology-to-block,  
1237 block-to-slice and slice-to-volume registration stages according to the halfway method as  
1238 described *section 2.9*. Figure 15 shows a representative final result of the registration between  
1239 MRI and histology for five of the six blocks stained for ferritin. Qualitatively identical  
1240 registrations were obtained with the PLP stains of the same five blocks. A three-dimensional  
1241 rendering of the registered histological sections can be seen in Figure 16.

1242

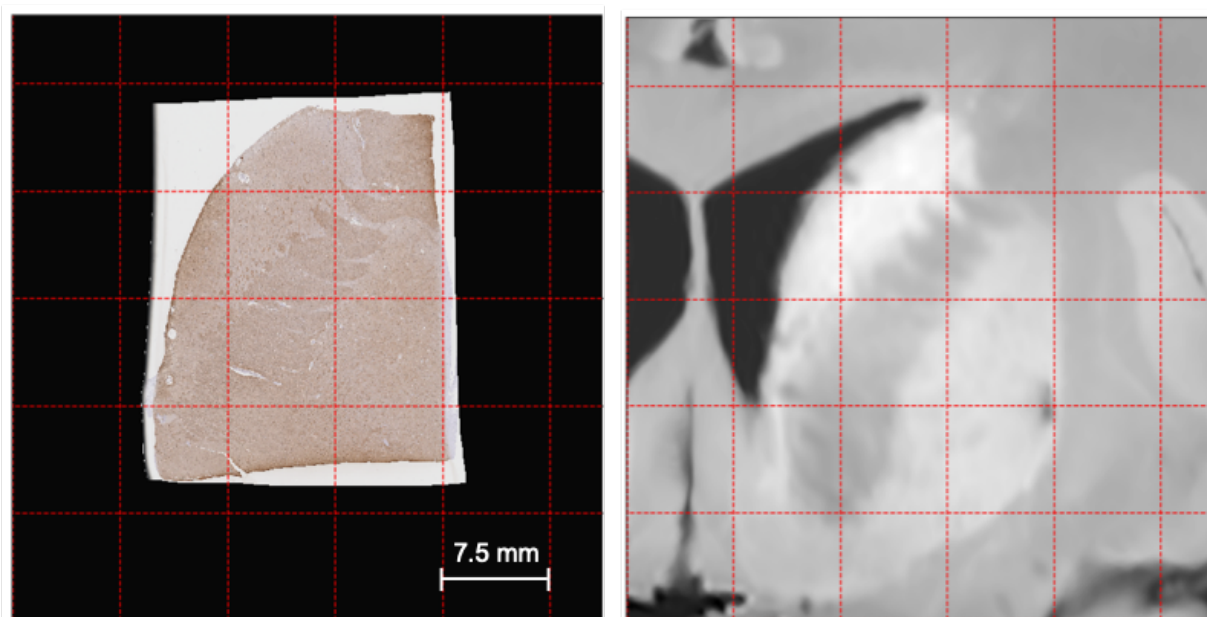

1243

1244 **Figure 15. End-to-end histology-to-MRI registration by combining stages 1-3. *Left:*** Histological section  
1245 of the anterior limb of the right internal capsule stained for ferritin. The image was resampled at the  
1246 resolution of the tissue block photograph (50  $\mu\text{m}/\text{pixel}$ ). ***Right:*** The corresponding 2D section of MRI  
1247 resampled at the resolution of the tissue block photograph. The *red gridlines* are provided as a common  
1248 spatial reference for comparing the images.

1249

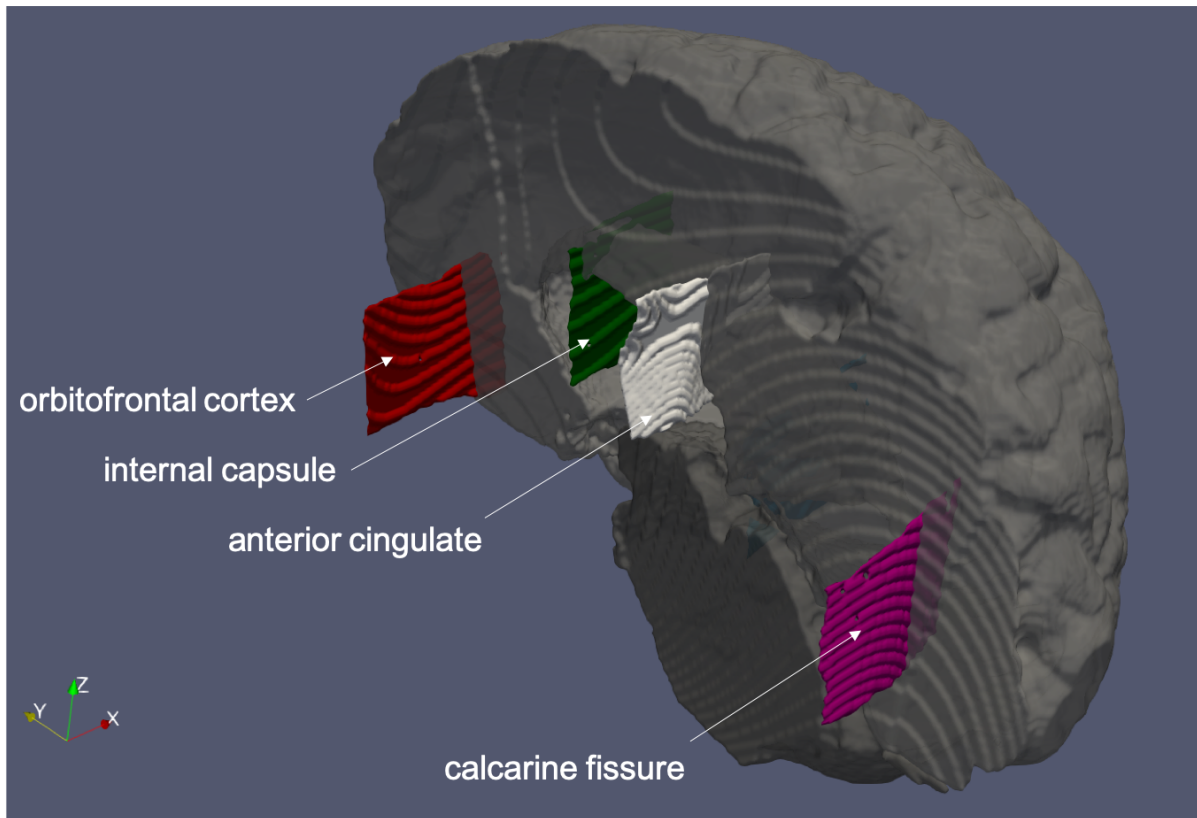

1250

1251 **Figure 16. Three-dimensional model of the post-mortem brain showing a subset of the registered**  
1252 **histological sections.** The registered sections are represented by their curvilinear image domains, which are  
1253 larger than the actual sections. The left-hand side of the brain was removed for better visualisation, and two  
1254 registered sections are not visible on this median sagittal surface view. Note that geodesic lines are accented  
1255 because the surfaces were reconstructed from voxel-wise labels in MRI space (voxel size: 0.5 mm).

1256

1257 In the case of a single tissue block, which was sampled symmetrically to the mid-sagittal plane  
1258 to contain the cross section of the corpus callosum and the anterior portion of the cingulate gyri  
1259 from both hemispheres, we noticed that both the ferritin and the PLP stains registered  
1260 imperfectly with the MR volume. The error was confined to a region within the image where  
1261 one of the gyri had a significantly larger separation from the corpus callosum in the MRI image,  
1262 that was not compensated by the free-form deformations of stage 3 (slice-to-volume  
1263 registration). Large local deformations of this kind are typically challenging because they are  
1264 heavily penalised by membrane energy regularisation, and only a condensed set of local control  
1265 points could accurately represent them without affecting the alignment in more distant regions  
1266 of the image. While the current implementation achieves sufficient accuracy in the largest  
1267 portion of this image, we anticipate that the observed type of registration error may be better  
1268 addressed in future versions of TIRL by suitable changes to stage-3 registration, as explained  
1269 in the *Discussion* section.

1270

1271 3.5. Stage 4 (optional): refinement by direct histology-to-MRI registration

1272

1273 In the two cases where an LFB+PAS stain was also performed subsequent to all other stains,  
1274 we noticed that the anatomical consistency between the histological images and tissue block  
1275 photo was not perfect due to the slicing depth problem (Figure 17A). As tissue blocks are  
1276 embedded in paraffin, which will generally have a slightly larger volume than the block itself,  
1277 it cannot be guaranteed that the surface of the paraffin block is parallel to the surface of the  
1278 tissue block. For sectioning in a microtome, the blocks are trimmed to remove any excess  
1279 paraffin from the surface of the block to fully expose the tissue. During this process some  
1280 sections come off the block as partial sections and are therefore discarded. Depending on the  
1281 angle of sectioning, the first full slice of tissue may come from as deep as 0.5–1 mm  
1282 (corresponding to an angle of 2° for a 30 mm long block). In the case of multiple stains, or  
1283 when stains need to be repeated for quality reasons, this problem is further exaggerated: the  
1284 deeper the block is sampled, the less consistent the stained histological sections will be with  
1285 the surface anatomy of the blocks as seen in the photographs. This means that the inaccuracies  
1286 at stage 1 (histology-to-block registration) should be dealt with less aggressively, as they may  
1287 reflect true differences between the stained section and the photograph. Instead a higher  
1288 regularisation weighting is preferred in these cases, to preserve the structural self-consistency  
1289 of the histological section while compensating for some of the distortions.

1290

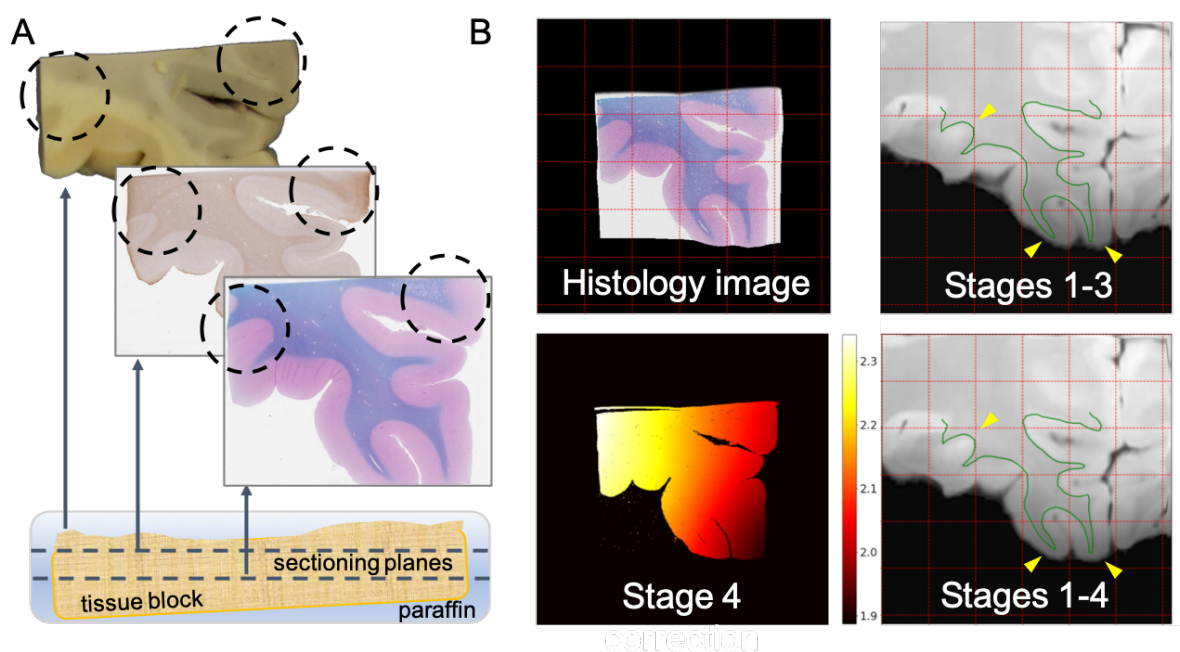

1291

1292 **Figure 17. The slicing depth problem and the optional 4th stage of the pipeline (direct histology-to-**  
1293 **MRI registration).** (A) **The slicing depth problem.** If the block is slightly tilted relative to the surface of  
1294 the paraffin embedding, a portion of the surface is abraded by the microtome before the first full section of  
1295 tissue is obtained. Subsequent slices are sampled at a relative depth from the surface, which may cause  
1296 substantial anatomical discrepancy between the surface of the block (as seen on the photograph) and the  
1297 surface of the slide. Consequently, the final end-to-end histology-to-MRI mapping will be inaccurate. (B)  
1298 **Stage-4 registration.** *Top row:* Alignment of the LFB+PAS-stained section (*top left*) of the left OFC with  
1299 the MRI before (*top right*) stage-4 correction. The *green curve* is the overlay of the hand-drawn grey-white  
1300 matter boundary of the transformed histological image. *Bottom row:* Result of stage-4 slicing depth  
1301 correction shows as much as 0.4 mm elevation difference across the surface of the section, corresponding to  
1302 a 1° tilt. (The numbers in the colour bar represent distance along the *z*-axis in millimetres after stage-4  
1303 registration starting from the best 3D affine alignment that was inferred from the combination of the previous  
1304 three stages.) *Bottom right:* Improved alignment (*yellow arrowheads*) of the same section with MRI after  
1305 stage-4 correction.

1306

1307 To compensate for the depth problem, in these two cases an additional fourth stage of the  
1308 pipeline was introduced. Stage 4 aims to fine tune the alignment between the histological  
1309 section and the MRI image by performing a direct registration between the MRI data and the  
1310 histological section after the latter is initialised to MRI space by the three main stages. First,  
1311 the histological section was resampled on the intermediate domain (tissue block photograph)  
1312 using the transformation chain from stage 1. The optimised transformation chains from the  
1313 second and third stages were then concatenated and attached to the domain of the resampled  
1314 histological image, mapping it into MRI space. The free-form deformation object from stage 3  
1315 was redefined within the combined transformation chain such that its new control points were  
1316 concentrated on the area of the histological image instead of being scattered across the whole  
1317 coronal brain slice. The parameters for this new transformation were fitted to preserve the  
1318 previously optimised in-plane and out-of-plane deformations within the area of the resampled  
1319 histology image. The updated chain of transformations was applied to obtain the physical  
1320 (MRI-space) coordinates of the resampled histological image. The centre of the inserted  
1321 histological section was determined by averaging the physical coordinates, and the normal  
1322 vector of the histological image was calculated as the 3<sup>rd</sup> principal component of the physical  
1323 coordinate array. The sample was gradually shifted in MRI space along the normal vector in  
1324 the range -2.5–2.5 mm, while the 3D rotation parameters were optimised within 12° in both  
1325 directions from the initial values for minimum  $SSD_{MIND}$  cost using the BOBYQA optimiser.  
1326 Finally, starting from the best position and rotation of the histological image, orthogonal and



1327 later free-form deformations were optimised with membrane energy regularisation within  
1328 1 mm of their initial values to obtain the final registration between histology and MRI. Figure  
1329 17B shows the alignment of the more offending LFB+PAS stained section before and after the  
1330 stage-4 correction. The correction included shifting the histological image from its original  
1331 position by approximately 2 mm and introducing 0.4 mm through-plane deformation.

1332

#### 1333 **4. Discussion**

1334

1335 In the past three decades a handful of studies have addressed different aspects of registering  
1336 histology and MR images by semi-automatic methods. However, most of these algorithms were  
1337 tailored to a specific application and/or they were implemented as in-house scripts, which are  
1338 no longer accessible to the larger community. In comparison, 3D-to-3D image registration is a  
1339 fundamental operation in the field of neuroimaging that most higher-level analysis methods  
1340 depend on. Consequently, 3D image registration tools are well-established and lie at the core  
1341 of popular analysis toolboxes, such as FSL, SPM, FreeSurfer, BrainSuite, *etc.* On the contrary,  
1342 similar registration tools are less well developed and mostly non-existent for hybrid  
1343 MRI/histology datasets, which has precluded the evolution of equally powerful analysis  
1344 toolboxes for this kind of data. Due to time and labour constraints, neuropathology facilities  
1345 are collecting the overwhelming majority of their histology data in the format of stand-alone  
1346 histological sections, not 3D stacks. The alignment of these images with volumetric MRI data  
1347 is a tedious and imperfect manual process, which obviates bias-free quantitative analysis, and  
1348 limits the number of samples and subjects that can be studied at once. With limited sample  
1349 sizes and imperfect matching, studies that aim to analyse MRI signal changes in diseased tissue  
1350 may not capture the significant interindividual variations in the spatial and temporal extent of  
1351 a disease (which are recognised as different phenotypes in neurodegenerative conditions).  
1352 Consequently, slice-to-volume histology-to-MRI registration is a fundamental operation that  
1353 must be automated before higher-level analyses can be performed on large volumes of this type  
1354 of data, and stable conclusions can be made about the pathological interpretation of  
1355 characteristic MRI signal changes.

1356

1357 In this paper, we presented an automated registration pipeline for sparsely sampled histology  
1358 data and post-mortem MRI. Our method does not require specialised cutting or stain  
1359 automation hardware for tissue processing and reduces the imperfections of alignment that  
1360 arise from freehand brain cutting, which altogether make it suitable for integration into routine

1361 neuropathological practice. The first three stages of the pipeline support full automation of the  
1362 registration, provided that suitable dissection photographs are available. Otherwise, the  
1363 optional stage 4 may be used on its own as a semi-automatic tool to register histological  
1364 sections to volumetric MRI after manual initialisation, although this feature should be tested  
1365 more thoroughly. Most importantly, all stages of the pipeline are embedded in the more general  
1366 open-source (Python 3.7) framework, TIRL, that allows them to be modified for a wider range  
1367 of applications, potentially including small-animal and non-human primate neuroimaging, as  
1368 well imaging other organs and tumours. Finally, we have decided to include TIRL and the  
1369 pipeline in FSL to facilitate continuous improvement to the framework and the registration  
1370 techniques therein, as well as to encourage the development of further analysis tools for hybrid  
1371 MRI/histology datasets.

1372

1373 As with all methods, our pipeline also has certain limitations. First, while we committed  
1374 significant efforts to ensure that the pipeline can perform all stages automatically, this is subject  
1375 to a set of assumptions about the input data. Based on the conditions under which the pipeline  
1376 was tested, we recommend observing the following precautions:

1377

1378 (1) Histological sections should be sampled close ( $<2.5$  mm) to the surface of the tissue  
1379 blocks. Care should be taken to avoid staining artefacts and tears during the sectioning  
1380 process. Stains with grey-white matter contrast must be used for registration.

1381 (2) The approximate location and rough orientation of coronal sections must be known in  
1382 advance.

1383 (3) Photographs should be taken at high resolution, under diffuse lighting conditions, on a  
1384 clean, matte surface that has a distinct colour from the brain tissue. Brain slices should  
1385 be photographed on both sides avoiding glares. The approximate mm/pixel resolution  
1386 of the photographs should be recorded.

1387 (4) MRI should be acquired at high resolution (0.5-1 mm) with sufficient grey-white matter  
1388 contrast. For post-mortem imaging, formalin-fixed brains should be immersed in an  
1389 inert fluorocarbon medium (e.g. Fluorinert) to minimise the background signal, and  
1390 scanned in a suitably shaped plastic container to prevent large deflections of the  
1391 hemispheres, the brainstem and the cerebellum.

1392

1393 While the above prescriptions may seem very restrictive, they directly reflect our own  
1394 experimental approach that was used to test both TIRL and the pipeline. We strongly believe

1395 that the capability of the software tools that were developed for this project extend beyond the  
1396 scope of the current application, and the flexibility of TIRL allows many of the above  
1397 restrictions to be loosened.

1398

1399 Registering histological stains with little or no grey-white matter contrast is beyond the scope  
1400 of the current work, and is therefore not readily supported by the current pipeline. However,  
1401 the results of a recent grand challenge competition (ANHIR) [66] might be used in the future  
1402 to register histological sections with different stains in advance, and the ones with appropriate  
1403 grey-white matter contrast to the MRI. Alternatively, these images could be registered linearly  
1404 by matching outer contours or non-linearly by manually defined landmarks. Either of these  
1405 approaches would be a straightforward extension to the current cost and transformation  
1406 libraries of TIRL.

1407

1408 Generality and optimal computational performance are often competing demands in software  
1409 engineering. Several features have been implemented in TIRL to make computations more  
1410 effective, such as parallel processing, chunked interpolation, function caching, optimising sub-  
1411 chains of linear transformations by affine replacement, and avoiding interpolation of  
1412 displacement fields where the field is defined over the same domain as the image. That said,  
1413 greater emphasis was put on preserving the generality of the framework. Therefore, some of  
1414 the computations may benefit from further optimisation, which lie beyond the scope of the  
1415 current work. One particular improvement would consider adaptive control point placement in  
1416 stages 3 and 4. Instead of initialising a fixed set of control points and optimising the  
1417 corresponding deformation parameters all-at-once, one could start with a smaller set of control  
1418 points and gradually increase their count. Whenever sufficient convergence is reached with the  
1419 current set, a new control point would be added where image dissimilarity is the greatest. This  
1420 strategy would provide better control over large local displacements by permitting local  
1421 clusters of control points, altogether leading to fewer registration errors.

1422

1423 Our experiments were carried out on a MacBook Pro computer with a dual-core 2.7GHz CPU  
1424 and 8 GB of RAM. The typical runtimes were ~2 minutes for stage 1, ~30 minutes for stage 2  
1425 (with 6 insertion sites), 1-2 hours for stage 3 (using 50 control points), and ~15 minutes for  
1426 stage 4 (where needed). For relatively undistorted slices, it is possible to reduce the runtime of  
1427 stage 3 by using fewer (e.g. 16 or even less) control points instead of 50. Running the stages in  
1428 parallel can also save significant amounts of time. With the adaptive control point placement

1429 described above, stage 3 and 4 could benefit from faster convergence, as only a subset of  
1430 parameters would need to be optimised in the first iterations, and the runtime of these stages  
1431 could be consequently greatly reduced.

1432

1433 Despite the current limitations, our method allows automated registration of histology to MRI  
1434 without labour-intensive sequential sampling and volumetric reconstruction of histology as  
1435 opposed to the majority of existing methods. Contrary to the methods of *Kim* et al and *Singh*  
1436 et al for slice-to-volume registration, our method does not require manual intervention for the  
1437 majority of the cases and uses more precise local deformations by radial basis functions instead  
1438 of polynomial transformations. Extending the framework-building approach of *Osechinskiy* et  
1439 al, using TIRL we successfully applied the MIND cost function [43] to register not only  
1440 hemispheres, but whole brain slice photographs as well as small histological samples that could  
1441 otherwise not be directly registered to MRI. Most importantly, our results demonstrate that  
1442 histological sections are not immune to out-of-plane deformations due to free-hand cuts  
1443 through the brain. Nevertheless, using TIRL, it is possible to align these images with MRI data  
1444 with sub-millimetre precision, which has important implications for biomarker research.

1445

1446 Establishing novel imaging-derived biomarkers that can sensitively and specifically indicate  
1447 the presence of a disease is one of the chief goals in modern medical imaging. Classic  
1448 radiological signs such as signal hypo- and hyperintensities in weighted MRI scans have  
1449 suboptimal disease specificity due to the complex dependency of the MRI signal on both the  
1450 acquisition parameters and a spectrum of elementary disease-related changes in tissue  
1451 microstructure. By modelling the signal behaviour in the healthy and the diseased state of  
1452 tissue, advanced microstructural MRI methods can be more specific to these elementary  
1453 changes, and thus the underlying pathological process. The clinical translation of these methods  
1454 requires thorough validation against histopathology, which will hopefully be facilitated by the  
1455 availability of MRI-histology registration tools. A more exciting implication is that as soon as  
1456 suitably large MRI/histology datasets become available, these could be used by learning  
1457 algorithms to detect subtle changes of the MRI signal related to tissue pathology, which would  
1458 otherwise be unnoticeable during routine radiological assessment. A new generation of such  
1459 histology-inspired imaging biomarkers could be more sensitive predictors of disease. In  
1460 neurodegenerative conditions, increased sensitivity to the early sub-clinical stages of the  
1461 disease is critical, as the anticipated benefit from any therapeutic approach is proportional to  
1462 the remaining functional capacity of the central nervous system.

1463

1464 **5. Conclusion**

1465

1466 The capabilities of a novel image registration framework, TIRL, were presented in the context  
1467 of creating an image registration pipeline for post-mortem MRI and sparsely sampled histology  
1468 data. Small stand-alone histological sections were successfully registered to post-mortem  
1469 whole-brain MRI without manual intervention in most cases, achieving a final accuracy of  
1470 0.5 – 1 mm. In-plane and out-of-plane deformations of the sampling surface were also taken  
1471 into account in the process. The method does not require additional specialist hardware for  
1472 tissue pre-processing, therefore it can be integrated into routine neuropathological practice.  
1473 Both TIRL and the registration pipeline is released as part of FSL, facilitating MRI-histology  
1474 validation studies to be carried out in much larger cohorts than previously possible. The  
1475 customisability of the presented software tools allows them to be reused in other research  
1476 contexts, and hopefully provide the necessary grounds for future explorative research into a  
1477 new generation of histology-inspired microstructural imaging biomarkers, that can be more  
1478 sensitive predictors of neurodegeneration.

1479

1480 **Authors' contributions**

1481

1482 *I. N. Huszar*: Designed, implemented, tested TIRL and all scripts of the registration pipeline,  
1483 created figures, wrote manuscript.

1484 *M. Pallebage-Gamarallage*: Designed the histopathological protocol of the MND study,  
1485 dissected brains, took dissection photographs and created stained histological specimens,  
1486 edited manuscript.

1487 *S. Foxley*: Designed the post-mortem MRI protocol of the MND study and acquired MRI  
1488 data, edited manuscript.

1489 *B. C. Tandler*: Created post-processing pipeline for post-mortem MRI data, edited  
1490 manuscript.

1491 *A. Leonte*: Prepared stained histological specimens of the anterior cingulate cortex, edited  
1492 manuscript.

1493 *M. Hiemstra*: Prepared stained histological specimens of the hippocampus, edited manuscript.

1494 *J. Mollink*: Prepared stained histological specimens of the hippocampus, edited manuscript.

1495 *A. Smart*: Prepared various stained histological specimens, edited manuscript.

1496 *S. Bangerter-Christensen*: Prepared various stained histological specimens, edited  
1497 manuscript.  
1498 *H. Brooks*: Prepared LFB-stained histological specimens, edited manuscript.  
1499 *O. Ansorge*: Designed MND study, provided neuropathological expertise, and material from  
1500 the Oxford Brain Bank, edited manuscript.  
1501 *M. R. Turner*: Designed MND study, provided neurological expertise, edited manuscript.  
1502 *K. L. Miller*: Designed MND study, provided MRI physics expertise, edited manuscript.  
1503 *M. Jenkinson*: Provided image analysis expertise, designed TIRL, the registration pipeline  
1504 and the experiments, edited manuscript.

1505

## 1506 **Acknowledgement**

1507

1508 The authors express their gratitude to the donors and benefactors of the Oxford Brain Bank,  
1509 that kindly provided all human tissues for this study. Core funding for the Oxford Brain Bank  
1510 was provided by the Medical Research Council (MRC), the NIHR Oxford Biomedical  
1511 Research Centre and the Brains for Dementia Research programme, jointly funded by  
1512 Alzheimer's Research UK and Alzheimer's Society and Brains for Dementia Research. INH  
1513 was supported by the Engineering and Physical Sciences Research Council (EPSRC) and the  
1514 MRC (EP/L016052/1), and the Clarendon Fund in partnership with the Chadwyck-Healey  
1515 Charitable Trust at Kellogg College (Oxford). MJ and OA were supported by the National  
1516 Institute for Health Research (NIHR) Oxford Biomedical Research Centre (BRC). MPG, SF  
1517 and the dataset used in this study were funded by an MRC Project Grant (MR/K02213X/1).  
1518 KLM, BCT and JM were funded by a Wellcome Trust Senior Research Fellowship  
1519 (202788/Z/16/Z). The Wellcome Trust provided core funding for the Wellcome Centre for  
1520 Integrative Neuroimaging (203139/Z/16/Z).

1521

## 1522 **Declaration of interest**

1523

1524 The authors declare no further competing interests other than the funding bodies mentioned in  
1525 the 'Acknowledgements' section. None of the mentioned funding bodies were directly  
1526 involved in the design of the study, nor in the collection, analysis or interpretation of the data.

1527

1528 **References**

1529

- 1530 1. Dugger, B.N. and D.W. Dickson, *Pathology of Neurodegenerative Diseases*. Cold  
1531 Spring Harb Perspect Biol, 2017. **9**(7).
- 1532 2. Soto, C. and S. Pritzkow, *Protein misfolding, aggregation, and conformational*  
1533 *strains in neurodegenerative diseases*. Nature Neuroscience, 2018. **21**(10): p. 1332-  
1534 1340.
- 1535 3. Braak, H., et al., *Staging of brain pathology related to sporadic Parkinson's disease*.  
1536 Neurobiol Aging, 2003. **24**(2): p. 197-211.
- 1537 4. Braak, H. and E. Braak, *Neuropathological staging of Alzheimer-related changes*.  
1538 Acta Neuropathol, 1991. **82**(4): p. 239-59.
- 1539 5. Braak, H., et al., *Amyotrophic lateral sclerosis--a model of corticofugal axonal*  
1540 *spread*. Nat Rev Neurol, 2013. **9**(12): p. 708-14.
- 1541 6. Brettschneider, J., et al., *Spreading of pathology in neurodegenerative diseases: a*  
1542 *focus on human studies*. Nat Rev Neurosci, 2015. **16**(2): p. 109-20.
- 1543 7. Lee, S.J., et al., *Protein aggregate spreading in neurodegenerative diseases:*  
1544 *problems and perspectives*. Neurosci Res, 2011. **70**(4): p. 339-48.
- 1545 8. Zhang, H., et al., *NODDI: practical in vivo neurite orientation dispersion and density*  
1546 *imaging of the human brain*. Neuroimage, 2012. **61**(4): p. 1000-16.
- 1547 9. Assaf, Y., et al., *AxCaliber: a method for measuring axon diameter distribution from*  
1548 *diffusion MRI*. Magn Reson Med, 2008. **59**(6): p. 1347-54.
- 1549 10. Laule, C., et al., *Myelin water imaging of multiple sclerosis at 7 T: correlations with*  
1550 *histopathology*. Neuroimage, 2008. **40**(4): p. 1575-80.
- 1551 11. MacKay, A., et al., *Insights into brain microstructure from the T2 distribution*. Magn  
1552 Reson Imaging, 2006. **24**(4): p. 515-25.
- 1553 12. McNab, J.A., et al., *Surface based analysis of diffusion orientation for identifying*  
1554 *architectonic domains in the in vivo human cortex*. Neuroimage, 2013. **69**: p. 87-100.
- 1555 13. Panagiotaki, E., et al., *Compartment models of the diffusion MR signal in brain white*  
1556 *matter: a taxonomy and comparison*. Neuroimage, 2012. **59**(3): p. 2241-54.
- 1557 14. Weiskopf, N., et al., *Advances in MRI-based computational neuroanatomy: from*  
1558 *morphometry to in-vivo histology*. Current Opinion in Neurology, 2015. **28**(4): p. 313-  
1559 322.
- 1560 15. Johansen-Berg, H. and T. Behrens, *Diffusion MRI: From Quantitative Measurement*  
1561 *to In vivo Neuroanatomy: Second Edition*. 2013: Elsevier Inc. 1-614.

- 1562 16. Dyrby, T.B., et al., *Validation strategies for the interpretation of microstructure*  
1563 *imaging using diffusion MRI*. Neuroimage, 2018. **182**: p. 62-79.
- 1564 17. Pallebage-Gamarallage, M., et al., *Dissecting the pathobiology of altered MRI signal*  
1565 *in amyotrophic lateral sclerosis: A post mortem whole brain sampling strategy for the*  
1566 *integration of ultra-high-field MRI and quantitative neuropathology*. BMC Neurosci,  
1567 2018. **19**(1): p. 11.
- 1568 18. Toga, A.W., K.L. Ambach, and S. Schluender, *High-resolution anatomy from in situ*  
1569 *human brain*. Neuroimage, 1994. **1**(4): p. 334-44.
- 1570 19. Schormann, T., A. Dabringhaus, and K. Zilles, *Statistics of deformations in histology*  
1571 *and application to improved alignment with MRI*. IEEE Trans Med Imaging, 1995.  
1572 **14**(1): p. 25-35.
- 1573 20. Mega, M.S., et al., *Mapping histology to metabolism: coregistration of stained whole-*  
1574 *brain sections to premortem PET in Alzheimer's disease*. Neuroimage, 1997. **5**(2): p.  
1575 147-53.
- 1576 21. Schormann, T. and K. Zilles, *Three-Dimensional linear and nonlinear*  
1577 *transformations: An integration of light microscopical and MRI data*. Human Brain  
1578 Mapping, 1998. **6**(5-6): p. 339-347.
- 1579 22. Jacobs, M.A., et al., *Registration and warping of magnetic resonance images to*  
1580 *histological sections*. Med Phys, 1999. **26**(8): p. 1568-78.
- 1581 23. Bardinet, É., et al. *Co-registration of Histological, Optical and MR Data of the*  
1582 *Human Brain*. 2002. Berlin, Heidelberg: Springer Berlin Heidelberg.
- 1583 24. Ourselin, S., et al. *Fusion of Histological Sections and MR Images: Towards the*  
1584 *Construction of an Atlas of the Human Basal Ganglia*. 2001. Berlin, Heidelberg:  
1585 Springer Berlin Heidelberg.
- 1586 25. Anderson, A.W., et al., *Comparison of brain white matter fiber orientation*  
1587 *measurements based on diffusion tensor imaging and light microscopy*. Conf Proc  
1588 IEEE Eng Med Biol Soc, 2006. **1**: p. 2249-51.
- 1589 26. Dauguet, J., et al., *Three-dimensional reconstruction of stained histological slices and*  
1590 *3D non-linear registration with in-vivo MRI for whole baboon brain*. J Neurosci  
1591 Methods, 2007. **164**(1): p. 191-204.
- 1592 27. Choe, A.S., et al., *Accuracy of image registration between MRI and light microscopy*  
1593 *in the ex vivo brain*. Magn Reson Imaging, 2011. **29**(5): p. 683-92.
- 1594 28. Yang, S., et al., *Integration of ultra-high field MRI and histology for connectome*  
1595 *based research of brain disorders*. Frontiers in Neuroanatomy, 2013. **7**(31).



- 1596 29. Pichat, J., et al., *A Survey of Methods for 3D Histology Reconstruction*. Med Image  
1597 Anal, 2018. **46**: p. 73-105.
- 1598 30. Rohde, G.K., A. Aldroubi, and B.M. Dawant, *Adaptive-bases algorithm for nonrigid*  
1599 *image registration*. Medical Imaging 2002. Vol. 4684. 2002: SPIE.
- 1600 31. Avants, B.B., et al., *A reproducible evaluation of ANTs similarity metric performance*  
1601 *in brain image registration*. Neuroimage, 2011. **54**(3): p. 2033-44.
- 1602 32. Iglesias, J.E., et al., *Joint registration and synthesis using a probabilistic model for*  
1603 *alignment of MRI and histological sections*. Medical Image Analysis, 2018. **50**: p.  
1604 127-144.
- 1605 33. Pichat, J., et al. *Part-to-Whole Registration of Histology and MRI Using Shape*  
1606 *Elements*. in *2017 IEEE International Conference on Computer Vision Workshops*  
1607 *(ICCVW)*. 2017.
- 1608 34. Malandain, G., et al., *Fusion of autoradiographs with an MR volume using 2-D and 3-*  
1609 *D linear transformations*. Neuroimage, 2004. **23**(1): p. 111-27.
- 1610 35. Amunts, K., et al., *BigBrain: An Ultrahigh-Resolution 3D Human Brain Model*.  
1611 Science, 2013. **340**(6139): p. 1472-1475.
- 1612 36. Alegro, M., et al. *Multimodal Whole Brain Registration: MRI and High Resolution*  
1613 *Histology*. in *2016 IEEE Conference on Computer Vision and Pattern Recognition*  
1614 *Workshops (CVPRW)*. 2016.
- 1615 37. Kim, T., et al., *Automatic registration of postmortem brain slices to MRI reference*  
1616 *volume*. IEEE Transactions on Nuclear Science, 2000. **47**(4): p. 1607-1613.
- 1617 38. Singh, M., et al., *Co-registration of In-Vivo Human MRI Brain Images to Postmortem*  
1618 *Histological Microscopic Images*. Int J Imaging Syst Technol, 2008. **18**(5-6): p. 325-  
1619 335.
- 1620 39. Meyer, C.R., et al., *A methodology for registration of a histological slide and in vivo*  
1621 *MRI volume based on optimizing mutual information*. Mol Imaging, 2006. **5**(1): p. 16-  
1622 23.
- 1623 40. Osechinskiy, S. and F. Kruggel, *Slice-to-Volume Nonrigid Registration of*  
1624 *Histological Sections to MR Images of the Human Brain*. Anatomy Research  
1625 International, 2011. **2011**.
- 1626 41. Powell, M.J.D., *The NEWUOA software for unconstrained optimization without*  
1627 *derivatives*, in *Large-Scale Nonlinear Optimization*, G. Di Pillo and M. Roma,  
1628 Editors. 2006, Springer US: Boston, MA. p. 255-297.

- 1629 42. Osechinskiy, S. and F. Kruggel, *Deformable registration of histological sections to*  
1630 *brain MR images using a hybrid boundary-based slice-to-volume approach*. Conf  
1631 Proc IEEE Eng Med Biol Soc, 2011. **2011**: p. 4876-9.
- 1632 43. Heinrich, M.P., et al., *MIND: modality independent neighbourhood descriptor for*  
1633 *multi-modal deformable registration*. Med Image Anal, 2012. **16**(7): p. 1423-35.
- 1634 44. Ohnishi, T., et al., *Deformable image registration between pathological images and*  
1635 *MR image via an optical macro image*. Pathol Res Pract, 2016. **212**(10): p. 927-936.
- 1636 45. De Barros, A., et al., *Matching ex vivo MRI With Iron Histology: Pearls and Pitfalls*.  
1637 Frontiers in Neuroanatomy, 2019. **13**(68).
- 1638 46. Majka, P. and D.K. Wójcik, *Possum—A Framework for Three-Dimensional*  
1639 *Reconstruction of Brain Images from Serial Sections*. Neuroinformatics, 2016. **14**(3):  
1640 p. 265-278.
- 1641 47. Alegro, M., et al. *Automating Whole Brain Histology to MRI Registration:*  
1642 *Implementation of a Computational Pipeline*. arXiv e-prints, 2019.
- 1643 48. Foxley, S., et al., *Improving diffusion-weighted imaging of post-mortem human*  
1644 *brains: SSFP at 7 T*. Neuroimage, 2014. **102 Pt 2**: p. 579-89.
- 1645 49. Jenkinson, M., et al., *Improved optimization for the robust and accurate linear*  
1646 *registration and motion correction of brain images*. Neuroimage, 2002. **17**(2): p. 825-  
1647 41.
- 1648 50. Jenkinson, M. and S. Smith, *Optimisation in Robust Linear Registration of Brain*  
1649 *Images*, in *FMRIB Analysis Group Technical Reports*. 2000:  
1650 <https://www.fmrib.ox.ac.uk/datasets/techrep/>.
- 1651 51. Shattuck, D.W. and R.M. Leahy. *BrainSuite: An Automated Cortical Surface*  
1652 *Identification Tool*. 2000. Berlin, Heidelberg: Springer Berlin Heidelberg.
- 1653 52. Fischer, B. and J. Modersitzki, *A unified approach to fast image registration and a*  
1654 *new curvature based registration technique*. Linear Algebra and its Applications,  
1655 2004. **380**: p. 107-124.
- 1656 53. Jenkinson, M., et al., *FSL*. Neuroimage, 2012. **62**(2): p. 782-90.
- 1657 54. Strother, S.C. *The NIfTI-1 data format*. 2004 [30/05/2019]; Available from:  
1658 <https://www.nitrc.org/docman/view.php/26/204/TheNIfTI1Format2004.pdf>.
- 1659 55. Jones, E., T. Oliphant, and P. Peterson. *SciPy: Open Source Scientific Tools for*  
1660 *Python*. 2001- [30/05/2019]; Available from: <http://www.scipy.org>.
- 1661 56. Johnson, S.G., *The NLOpt nonlinear-optimization package*.

- 1662 57. Yang, D., et al., *A fast inverse consistent deformable image registration method based*  
1663 *on symmetric optical flow computation*. Phys Med Biol, 2008. **53**(21): p. 6143-65.
- 1664 58. Powell, M.J.D., *An efficient method for finding the minimum of a function of several*  
1665 *variables without calculating derivatives*. The Computer Journal, 1964. **7**(2): p. 155-  
1666 162.
- 1667 59. Powell, M.J.D., *The BOBYQA algorithm for bound constrained optimization without*  
1668 *derivatives*. 2009, Cambridge University.
- 1669 60. Modersitzki, J., *Numerical Methods for Image Registration*. 2003: Oxford University  
1670 Press.
- 1671 61. Fischer, B. and J. Modersitzki, *Fast inversion of matrices arising in image*  
1672 *processing*. Numerical Algorithms, 1999. **22**(1): p. 1-11.
- 1673 62. Zikic, D., A. Kamen, and N. Navab. *Revisiting Horn and Schunck: Interpretation as*  
1674 *Gauss-Newton Optimisation* 2010. Aberystwyth: BMVA Press.
- 1675 63. Oliphant, T.E., *Python for Scientific Computing*. Computing in Science &  
1676 Engineering, 2007. **9**(3): p. 10-20.
- 1677 64. Schindelin, J., et al., *Fiji: an open-source platform for biological-image analysis*.  
1678 Nature Methods, 2012. **9**(7): p. 676-682.
- 1679 65. Halton, J.H., *Algorithm 247: Radical-inverse quasi-random point sequence*.  
1680 Commun. ACM, 1964. **7**(12): p. 701-702.
- 1681 66. Borovec, J., et al. *Automatic Non-rigid Histological Image Registration*. 2019  
1682 30/05/2019]; Available from: <https://anhir.grand-challenge.org/>.
- 1683
